# Supplementary material for: Structural and Molecular Insight into Piperazine and Piperidine Derivatives as Histamine H3 and Sigma-1 Receptor Antagonists with Promising Antinociceptive Properties
Source: PubMed Central journal article supplement (PMC8739840; doi:10.1021/acschemneuro.1c00435), 2021-12-15

## Supplementary Material

### Structural and molecular insight into piperazine and piperidine derivatives as histamine H<sub>3</sub> and sigma-1 receptor antagonists with promising antinociceptive properties

Katarzyna Szczepańska<sup>+,a,b</sup>, Sabina Podlewska<sup>+,a,b,\*</sup>, Maria Dichiarà<sup>c</sup>, Davide Gentile<sup>c</sup>, Vincenzo Patamia<sup>c</sup>, Niklas Rosier<sup>d</sup>, Denise Mönnich<sup>d</sup>, M<sup>a</sup> Carmen Ruiz Cantero<sup>e</sup>, Tadeusz Karcz<sup>a</sup>, Dorota Łażewska<sup>a</sup>, Steffen Pockes<sup>d</sup>, Agata Siwek<sup>f</sup>, Enrique J. Cobos<sup>e</sup>, Agostino Marrazzo<sup>c</sup>, Holger Stark<sup>g</sup>, Antonio Rescifina<sup>c</sup>, Andrzej J. Bojarski<sup>b</sup>, Emanuele Amata<sup>c,\*</sup>, Katarzyna Kieć-Kononowicz<sup>a,\*</sup>

<sup>a</sup> Department of Technology and Biotechnology of Drugs, Faculty of Pharmacy, Jagiellonian University Medical College, Medyczna 9, Kraków 30-688, Poland

<sup>b</sup> Maj Institute of Pharmacology, Polish Academy of Sciences, Smełna 12, Kraków 31-343, Poland

<sup>c</sup> Department of Drug and Health Sciences, University of Catania, V.le A. Doria, 95125 Catania, Italy

<sup>d</sup> Institute of Pharmacy, Faculty of Chemistry and Pharmacy, University of Regensburg, Universitätsstraße 31, D-93053 Regensburg, Germany

<sup>e</sup> Department of Pharmacology and Neurosciences Institute (Biomedical Research Center), University of Granada, and Biosanitary Research Institute *ibs.GRANADA*, Avenida de la Investigación 11, 18016 Granada, Spain

<sup>f</sup> Department of Pharmacobiology, Faculty of Pharmacy, Jagiellonian University Medical College, Medyczna 9, Kraków 30-688, Poland

<sup>g</sup> Institute of Pharmaceutical and Medicinal Chemistry, Heinrich Heine University Düsseldorf, Universitätsstr. 1, 40225 Duesseldorf, Germany

\* Corresponding authors. E-mail addresses: [smusz@if-pan.krakow.pl](mailto:smusz@if-pan.krakow.pl) (Sabina Podlewska), [mfkonono@cyf-kr.edu.pl](mailto:mfkono@cyf-kr.edu.pl) (Katarzyna Kieć-Kononowicz), [eamata@unict.it](mailto:eamata@unict.it) (Emanuele Amata).

[\*] These authors contributed equally to this work.

## Contents

|                                                                                                                                                  |    |
|--------------------------------------------------------------------------------------------------------------------------------------------------|----|
| 1. Purity confirmation data.....                                                                                                                 | S2 |
| 2. Chemistry.....                                                                                                                                | S3 |
| 3. Calibration of parameters for the Smina scoring function.....                                                                                 | S4 |
| 4. Molecular modeling – 3D docking poses of compounds 4, 5, and 11 in the binding site of $\sigma_1$ R, $\sigma_2$ R, and H <sub>3</sub> R<br>S5 |    |
| 5. Outcome of correlational studies between frequency of interaction of ligands with particular amino acid residues of $\sigma$ R.....           | S6 |
| 6. References.....                                                                                                                               | S8 |
| 7. <sup>1</sup> H- and <sup>13</sup> C-NMR spectra of compounds 11 and 12. HPLC traces of all the final compounds.....                           | S9 |

## 1. Purity confirmation data

Mass spectra (LC/MS) were performed on Waters TQ Detector mass spectrometer. High-resolution mass spectra (HRMS) were performed on UltrafleXtreme maldi-tof/tof mass spectrometer. HPLC analyses were performed on Waters Alliance 2695 Separations Module with Waters 2998 Photodiode Array Detector (Chromolith® SpeedROD RP-18 endcapped 50-4.6 HPLC column was used)<sup>1-4</sup>. Elemental analyses (C, H, N) were performed on an Elemental AnalyserVarioEl III (Hanau, Germany) and agreed with theoretical values within  $\pm 0.4\%$ <sup>1,2</sup>.

| Cpd | LC/MS      |                      | HRMS                              |                                     | RP-HPLC    |                      | References |          |
|-----|------------|----------------------|-----------------------------------|-------------------------------------|------------|----------------------|------------|----------|
|     | Purity [%] | Retention time [min] | ESI <i>m/z</i> [M+H] <sup>+</sup> | MALDI <i>m/z</i> [M+H] <sup>+</sup> | Purity [%] | Retention time [min] |            | <i>k</i> |
| 1   | 100        | 3.23                 | 326                               | 326.217                             | 99.21      | 0.923                | 1.64       | 3        |
| 2   | 100        | 4.02                 | 355                               | -                                   | 99.30      | 1.082                | 2.09       | 1        |
| 3   | 100        | 1.87                 | 341                               | -                                   | 100        | 0.723                | 1.07       | 2        |
| 4   | 100        | 3.04                 | 366                               | 366.203                             | 100        | 0.756                | 1.16       | 4        |
| 5   | 100        | 3.28                 | 365                               | 365.209                             | 100        | 0.788                | 1.25       | 4        |
| 6   | 100        | 3.89                 | 374                               | 374.224                             | 99.64      | 1.111                | 2.17       | 3        |
| 7   | 100        | 3.67                 | 399                               | 399.234                             | 99.40      | 0.971                | 1.77       | 4        |
| 8   | 97.83      | 3.18                 | 402                               | 402.212                             | 95.42      | 0.971                | 1.77       | 3        |
| 9   | 97.28      | 4.07                 | 436                               | 436.183                             | 95.56      | 1.040                | 1.97       | 4        |
| 10  | 95.61      | 3.61                 | 420                               | 420.195                             | 95.76      | 0.928                | 1.65       | 4        |
| 11  | 100        | 5.24                 | 296                               | 296.209                             | 100        | 1.280                | 2.66       | -        |
| 12  | 100        | 4.47                 | 324                               | 324.201                             | 100        | 1.140                | 2.26       | -        |
| 13  | 100        | 4.18                 | 369                               | -                                   | 100        | 1.168                | 2.34       | 1        |
| 14  | 98.46      | 4.66                 | 383                               | -                                   | 98.06      | 1.252                | 2.58       | 1        |
| 15  | 100        | 2.26                 | 355                               | -                                   | -          | -                    | -          | 2        |
| 16  | 93.73      | 2.90                 | 382                               | 382.253                             | 92.19      | 0.942                | 1.69       | 3        |
| 17  | 100        | 3.43                 | 396                               | 396.266                             | 100        | 1.029                | 1.94       | 3        |
| 18  | 100        | 5.26                 | 396                               | 396.303                             | 100        | 1.334                | 2.81       | 3        |
| 19  | 94.79      | 3.69                 | 410                               | 410.284                             | 94.47      | 1.124                | 2.21       | 3        |
| 20  | 100        | 4.03                 | 424                               | 424.296                             | 100        | 1.202                | 2.43       | 3        |

**Cpd 2:** Anal. Calcd for C<sub>22</sub>H<sub>31</sub>N<sub>3</sub>O x C<sub>2</sub>H<sub>2</sub>O<sub>4</sub>: C, 64.99, N, 9.47, H, 7.50%. Found: C, 64.96, N, 9.52, H, 7.48.

**Cpd 13:** Anal. Calcd for C<sub>23</sub>H<sub>33</sub>N<sub>3</sub>O x C<sub>2</sub>H<sub>2</sub>O<sub>4</sub>: C, 65.62, N, 9.18, H, 7.71%. Found: C, 65.60, N, 9.19, H, 7.72.

**Cpd 14:** Anal. Calcd for C<sub>24</sub>H<sub>35</sub>N<sub>3</sub>O x C<sub>2</sub>H<sub>2</sub>O<sub>4</sub>: C, 66.22, N, 8.91, H, 7.91%. Found: C, 66.19, N, 8.89, H, 7.91.

**Cpd 15:** Anal. Calcd for C<sub>21</sub>H<sub>27</sub>N<sub>3</sub>O<sub>2</sub> x C<sub>2</sub>H<sub>2</sub>O<sub>4</sub>: C, 62.29, N, 9.47, H, 6.59%. Found: C, 62.32, N, 9.49, H, 6.63.

## 2. Chemistry

Compounds **11** and **12** were obtained by *N*-alkylation of piperidine with proper bromides by the method described by Kuder *et al.*<sup>5</sup> Both compounds have been previously described in the literature<sup>6,7</sup>.

### *(Biphenyl-4-yloxy)propyl)piperidine hydrogen oxalate (11)*

4-(3-Bromopropoxy)-1,1'-biphenyl (CAS113795-28-1) (1.46 g; 5 mmol), piperidine (0.21 g; 2.5 mmol) was refluxed for 24 h in the mixture of ethanol-water (5:1) with the powdered potassium carbonate (0.52 g; 3.8 mmol) and catalytic amount of potassium iodide. After purification oily product was converted into hydrogen oxalate. White solid, yield (28%), m.p. 213-215 °C, C<sub>22</sub>H<sub>27</sub>NO<sub>5</sub> (MW=385.46). <sup>1</sup>H NMR (500 MHz, DMSO-*d*<sub>6</sub>) δ ppm: 7.54 - 7.59 (m, 4H), 7.36 - 7.42 (m, 2H), 7.27 (tt, *J*=7.30, 1.15 Hz, 1H), 6.96 - 7.01 (m, 2H), 4.05 (t, *J*=6.01 Hz, 2H), 3.02 - 3.16 (m, 4H), 2.46 - 2.47 (m, 2H), 2.04 - 2.14 (m, 2H), 1.68 (br. s., 4H), 1.49 (br. s., 2H). <sup>13</sup>C NMR (DMSO-*d*<sub>6</sub>): 164.85, 158.43, 140.27, 133.34, 129.42, 128.32, 126.71, 115.48, 65.62, 54.09, 52.82, 24.22, 23.36, 22.10. LC-MS: purity 100% t<sub>R</sub>= 5.24, (ESI) *m/z* [M+H]<sup>+</sup> 296.20.

### *Phenyl (4-(3-(piperidin-1-yl)propoxy)phenyl)phenyl)methanone hydrogen oxalate (12)*

4-(3-Bromopropoxy)phenyl(phenyl)methanone (CAS108357-63-7) (0.998 g; 3.85 mmol), piperidine (0.328g; 3.85 mmol) was refluxed for 24 h in the mixture of ethanol-water (5:1) with the powdered potassium carbonate (0.69 g; 5 mmol) and catalytic amount of potassium iodide. After purification oily product was converted into hydrogen oxalate. White solid, yield (45%), m.p. 129-132 °C, C<sub>23</sub>H<sub>27</sub>NO<sub>6</sub> (MW=413.47). <sup>1</sup>H NMR (300 MHz, DMSO-*d*<sub>6</sub>) δ ppm: 7.69 - 7.73 (m, 2H), 7.60 - 7.66 (m, 3H), 7.49 - 7.54 (m, 2H), 7.03 - 7.08 (m, 2H), 4.11 (t, *J*=6.16 Hz, 2H), 2.95 - 3.19 (m, 6H), 2.08 - 2.17 (m, 2H), 1.65 - 1.74 (m, 4H), 1.49 (br. s., 2H). <sup>13</sup>C NMR (DMSO-*d*<sub>6</sub>): 194.97, 165.21, 162.52, 138.25, 132.73, 129.79, 129.01, 114.90, 66.01, 53.85, 52.67, 23.94, 23.18, 22.06. LC-MS: purity 100% t<sub>R</sub>= 4.47, (ESI) *m/z* [M+H]<sup>+</sup> 324.18.

None of the final structures has the Pan-assay interference compounds properties<sup>8</sup>.

### 3. Calibration of parameters for the Smina scoring function

**Table S1.** Well-known  $\sigma_1$  and  $\sigma_2$  receptor ligands used to test the new calibrated Smina scoring function, and their experimental and calculated binding constant values.

| Compound    | Exp. $\sigma_1$ $K_i$ (nM) | Calcd $K_i$ $\sigma_1$ (nM) | Exp. $\sigma_2$ $K_i$ (nM) | Calcd $K_i$ $\sigma_2$ (nM) |
|-------------|----------------------------|-----------------------------|----------------------------|-----------------------------|
| Ifenprodil  | 1.02                       | 2.93                        | 18.8                       | 26.62                       |
| PRE-084     | 2.2                        | 3.68                        | 13091                      | 14691.11                    |
| Haloperidol | 2.6                        | 3.24                        | 77                         | 89.57                       |
| Pentazocine | 4.3                        | 6.30                        | 1465                       | 1285.65                     |
| BD1063      | 13.7                       | 16.70                       | 204                        | 231.24                      |
| S1RA        | 17                         | 24.00                       | 9300                       | 9795.90                     |
| DTG         | 124                        | 102.65                      | 18                         | 22.23                       |
| F-ISO       | 330                        | 357.87                      | 6.95                       | 8.35                        |
| RHM-4       | 2150                       | 2071.76                     | 0.26                       | 1.61                        |
| Pitolisant  | 0.5                        | 1.09                        | 6.5                        | 8.14                        |

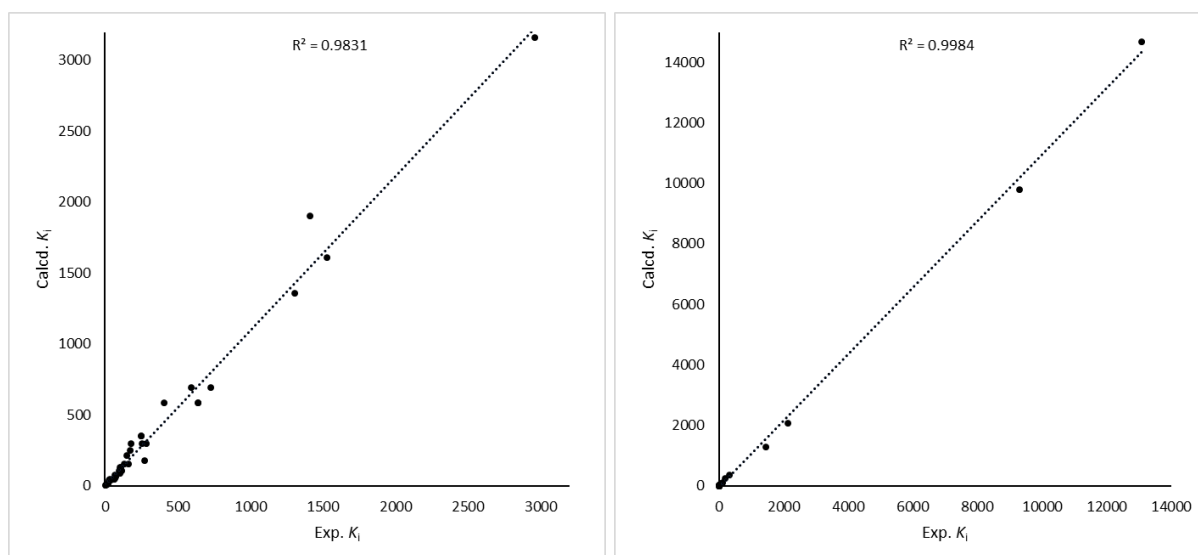

**Figure S1.** 2D plot of the linear regression fit between experimental and calculated  $\sigma_1$  and  $\sigma_2$  binding constants values for (left) compounds 1–14, and 16–20 (the training set), reported in Table 1, and (right) those of the chosen well-known ligands (the test set), reported in Table S1. All values have been calculated by the calibrated Smina scoring function employing the optimized parameters reported in Table 2.

#### 4. Molecular modeling – 3D docking poses of compounds 4, 5, and 11 in the binding site of $\sigma_1R$ , $\sigma_2R$ , and H<sub>3</sub>R

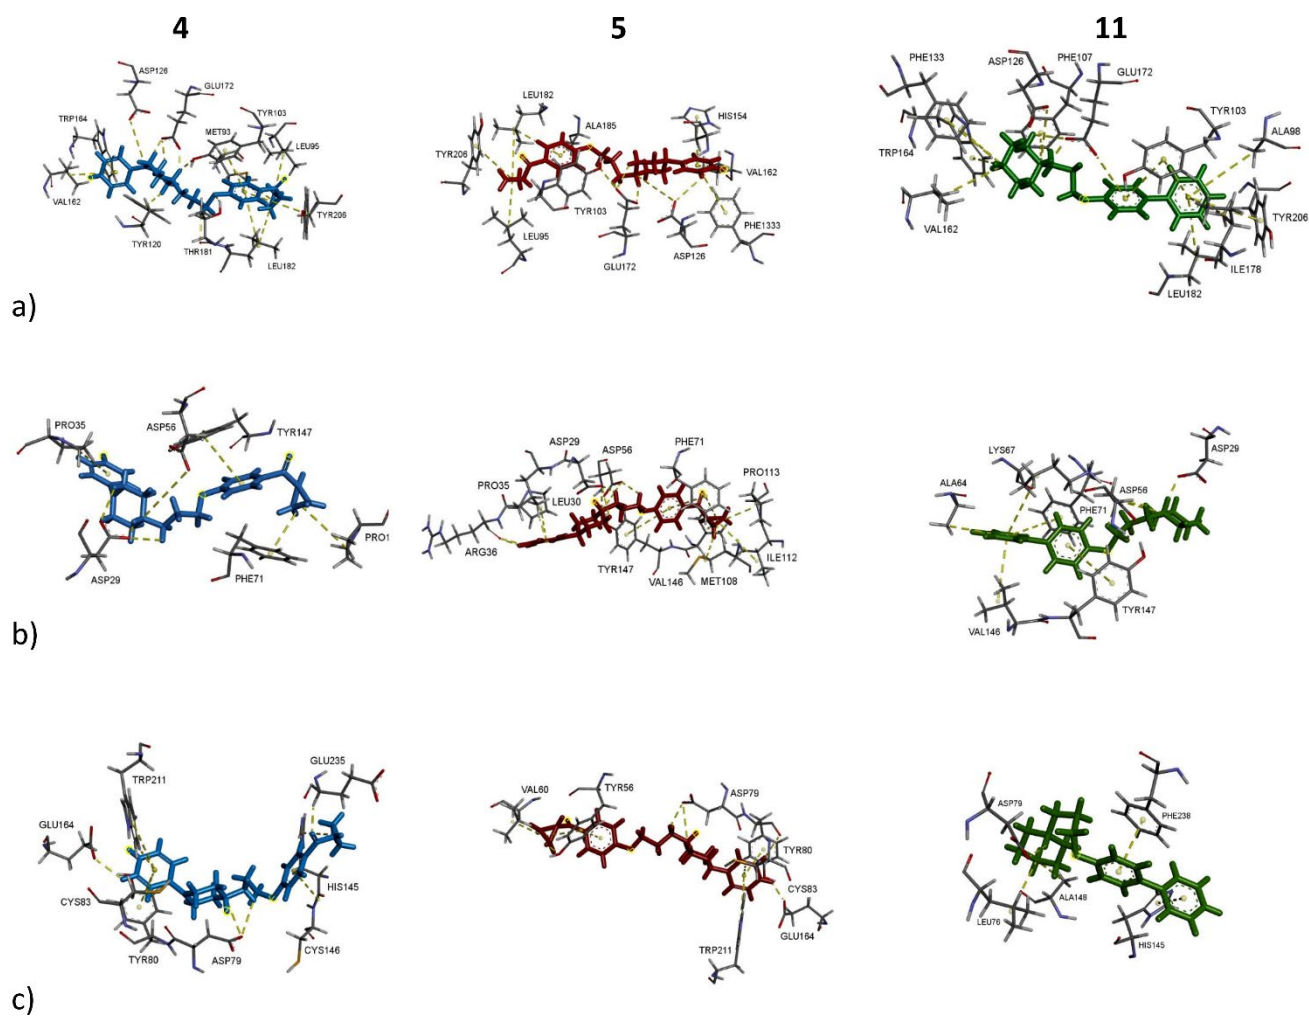

**Figure S2.** 3D docking poses of compounds 4, 5, and 11 in the binding site of a)  $\sigma_1R$ , b)  $\sigma_2R$ , c) H<sub>3</sub>R.

## 5. Outcome of correlational studies between frequency of interaction of ligands with particular amino acid residues of $\sigma$ Rs

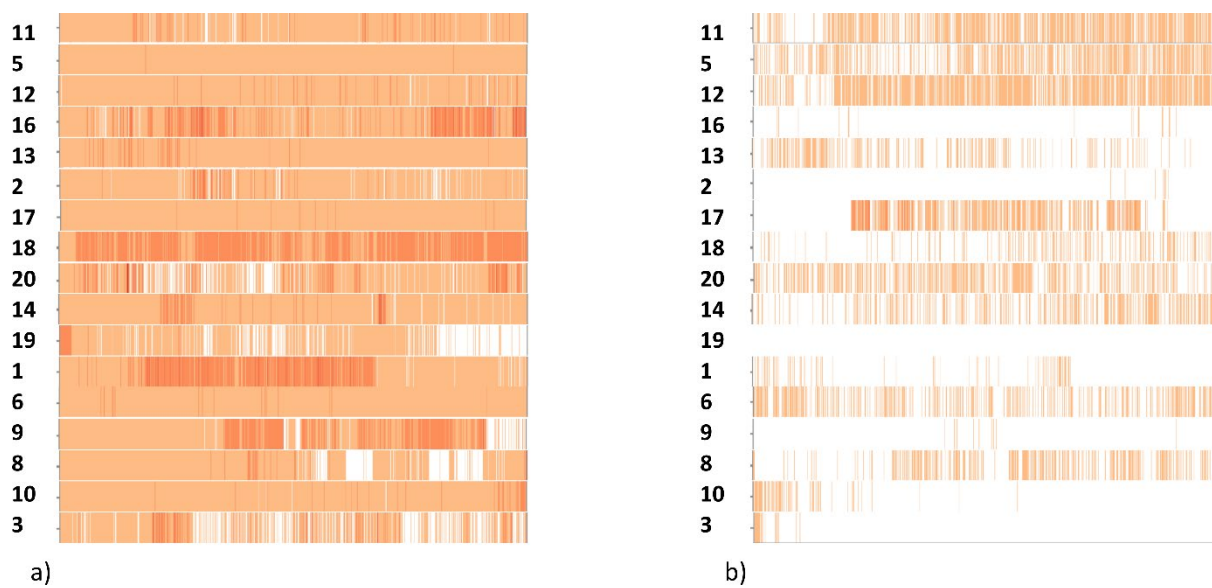

Figure S3. Ligand-protein interaction diagrams obtained during MD simulations for the highest correlated residues of  $\sigma_1$ R: a) E172, b) Y206.

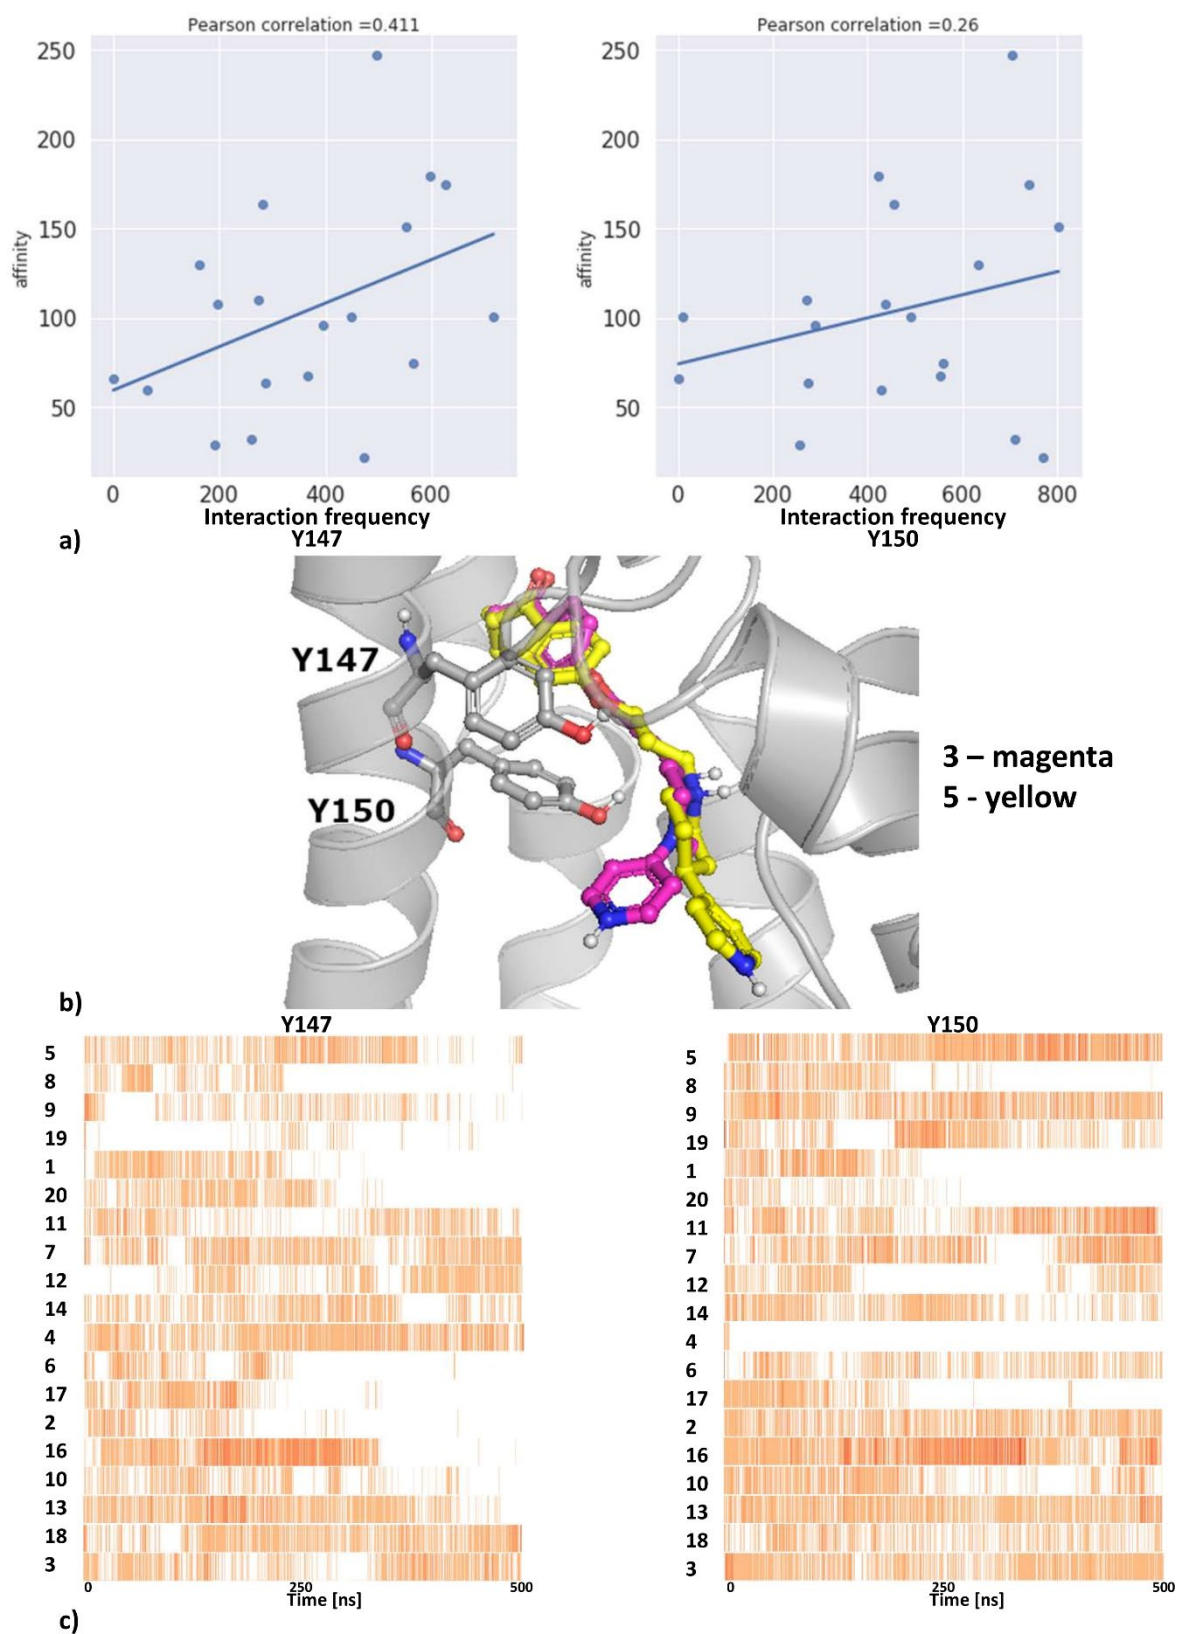

**Figure S4.** Outcome of correlational studies between frequency of interaction of ligands with particular amino acid residues of  $\sigma_2R$ , a) Pearson correlation coefficients for the highest correlated residues, b) visualization of the highest correlated residues with examples of docked compounds, c) ligand-protein interaction diagrams obtained during md simulations for the highest correlated residues.

## 6. References

1. Szczepańska K, Karcz T, Mogilski S, Siwek A, Kuder KJ, Latacz G, Kubacka M, Hagenow S, Lubelska A, Olejarz A, Kotańska M, Sadek B, Stark H, Kieć-Kononowicz K. Synthesis and biological activity of novel *tert*-butyl and *tert*-pentylphenoxyalkyl piperazine derivatives as histamine H<sub>3</sub>R ligands. *Eur J Med Chem.* 2018; 152: 223-234.
2. Szczepańska K, Karcz T, Kotańska M, Siwek A, Kuder KJ, Latacz G, Mogilski S, Hagenow S, Lubelska A, Sobolewski M, Stark H, Kieć-Kononowicz K. Optimization and preclinical evaluation of novel histamine H<sub>3</sub> receptor ligands: Acetyl and propionyl phenoxyalkyl piperazine derivatives. *Bioorganic Med Chem.* 2018; 26(23-24): 6056-6066.
3. Szczepańska K, Karcz T, Siwek A, Kuder KJ, Latacz G, Bednarski M, Szafarz M, Hagenow S, Lubelska A, Olejarz-Maciej A, Sobolewski M, Mika K, Kotańska M, Stark H, Kieć-Kononowicz K. Structural modifications and *in vitro* pharmacological evaluation of 4-pyridyl-piperazine derivatives as an active and selective histamine H<sub>3</sub> receptor ligands. *Bioorg Chem.* 2019; 103071.
4. Szczepańska K, Pockes S, Podlewska S, Höring C, Mika K, Latacz G, Bednarski M, Siwek A, Karcz T, Nagl M, Bresinsky M, Mönnich D, Seibel U, Kuder KJ, Kotańska M, Stark H, Elz S, Kieć-Kononowicz K. Structural modifications in the distal, regulatory region of histamine H<sub>3</sub> receptor antagonists leading to the identification of a potent anti-obesity agent. *Eur J Med Chem.* 2020; 113041. doi:10.1016/j.ejmech.2020.113041.
5. Kuder K, Łażewska D, Latacz G, Schwed JS, Karcz T, Stark H, Karolak-Wojciechowska J, Kieć-Kononowicz K. Chlorophenoxy aminoalkyl derivatives as histamine H<sub>3</sub>R ligands and antiseizure agents. *Bioorganic Med Chem.* 2016, 24(2): 53-72.
6. Bertrand I, Capet M, Lecomte JM, Levoine N, Ligneau X, Poupardin-Olivier O, Robert P, Schwartz JC, Labeeuw O. BIOPROJET. Phenoxypropylpiperidines and -pyrrolidines and their use as histamine H<sub>3</sub> -receptor ligands. WO2006117609 (2006)
7. Levoine N, Labeeuw O, Calmels T, Poupardin-Olivier O, Berrebi-Bertrand I, Lecomte JM, Schwartz JC, Capet M. Novel and highly potent histamine H<sub>3</sub> receptor ligands. Part 1: Withdrawing of hERG activity. *Bioorganic Med Chem Lett.* 2011, 21(18): 5378-5383.
8. Baell JB, Holloway GA. New substructure filters for removal of pan assay interference compounds (PAINS) from screening libraries and for their exclusion in bioassays. *J Med Chem.* 2010, 53(7): 2719-2740.



**7.  $^1\text{H}$ - and  $^{13}\text{C}$ -NMR spectra of compounds 11 and 12. HPLC traces of all the final compounds**

# Cpd11

|                               |                                                   |                              |                        |                         |                      |                               |            |
|-------------------------------|---------------------------------------------------|------------------------------|------------------------|-------------------------|----------------------|-------------------------------|------------|
| <b>Acquisition Time (sec)</b> | 3.4918                                            | <b>Date</b>                  | 30 Oct 2020 10:57:56   | <b>Date Stamp</b>       | 30 Oct 2020 10:57:08 |                               |            |
| <b>File Name</b>              | C:\Users\turbo\Desktop\E377_905_33_PROTON-1-1.jdf |                              | <b>Frequency (MHz)</b> | 500.16                  | <b>Nucleus</b>       | 1H                            |            |
| <b>Origin</b>                 | ECA                                               | <b>Original Points Count</b> | 32768                  | <b>Owner</b>            | delta                | <b>Number of Transients</b>   | 8          |
| <b>Solvent</b>                | DMSO-d6                                           | <b>Spectrum Offset (Hz)</b>  | 3251.0396              | <b>Sweep Width (Hz)</b> | 9384.38              | <b>Pulse Sequence</b>         | proton.jxp |
|                               |                                                   |                              |                        | <b>Points Count</b>     | 32768                | <b>Temperature (degree C)</b> | 22.500     |

<sup>1</sup>H NMR (500 MHz, DMSO-d<sub>6</sub>) δ ppm 1.49 (br. s., 2 H) 1.68 (br. s., 4 H) 2.04 - 2.14 (m, 2 H) 2.46 - 2.47 (m, 2 H) 3.02 - 3.16 (m, 4 H) 4.05 (t, *J*=6.01 Hz, 2 H) 6.96 - 7.01 (m, 2 H) 7.27 (tt, *J*=7.30, 1.15 Hz, 1 H) 7.36 - 7.42 (m, 2 H) 7.54 - 7.59 (m, 4 H)

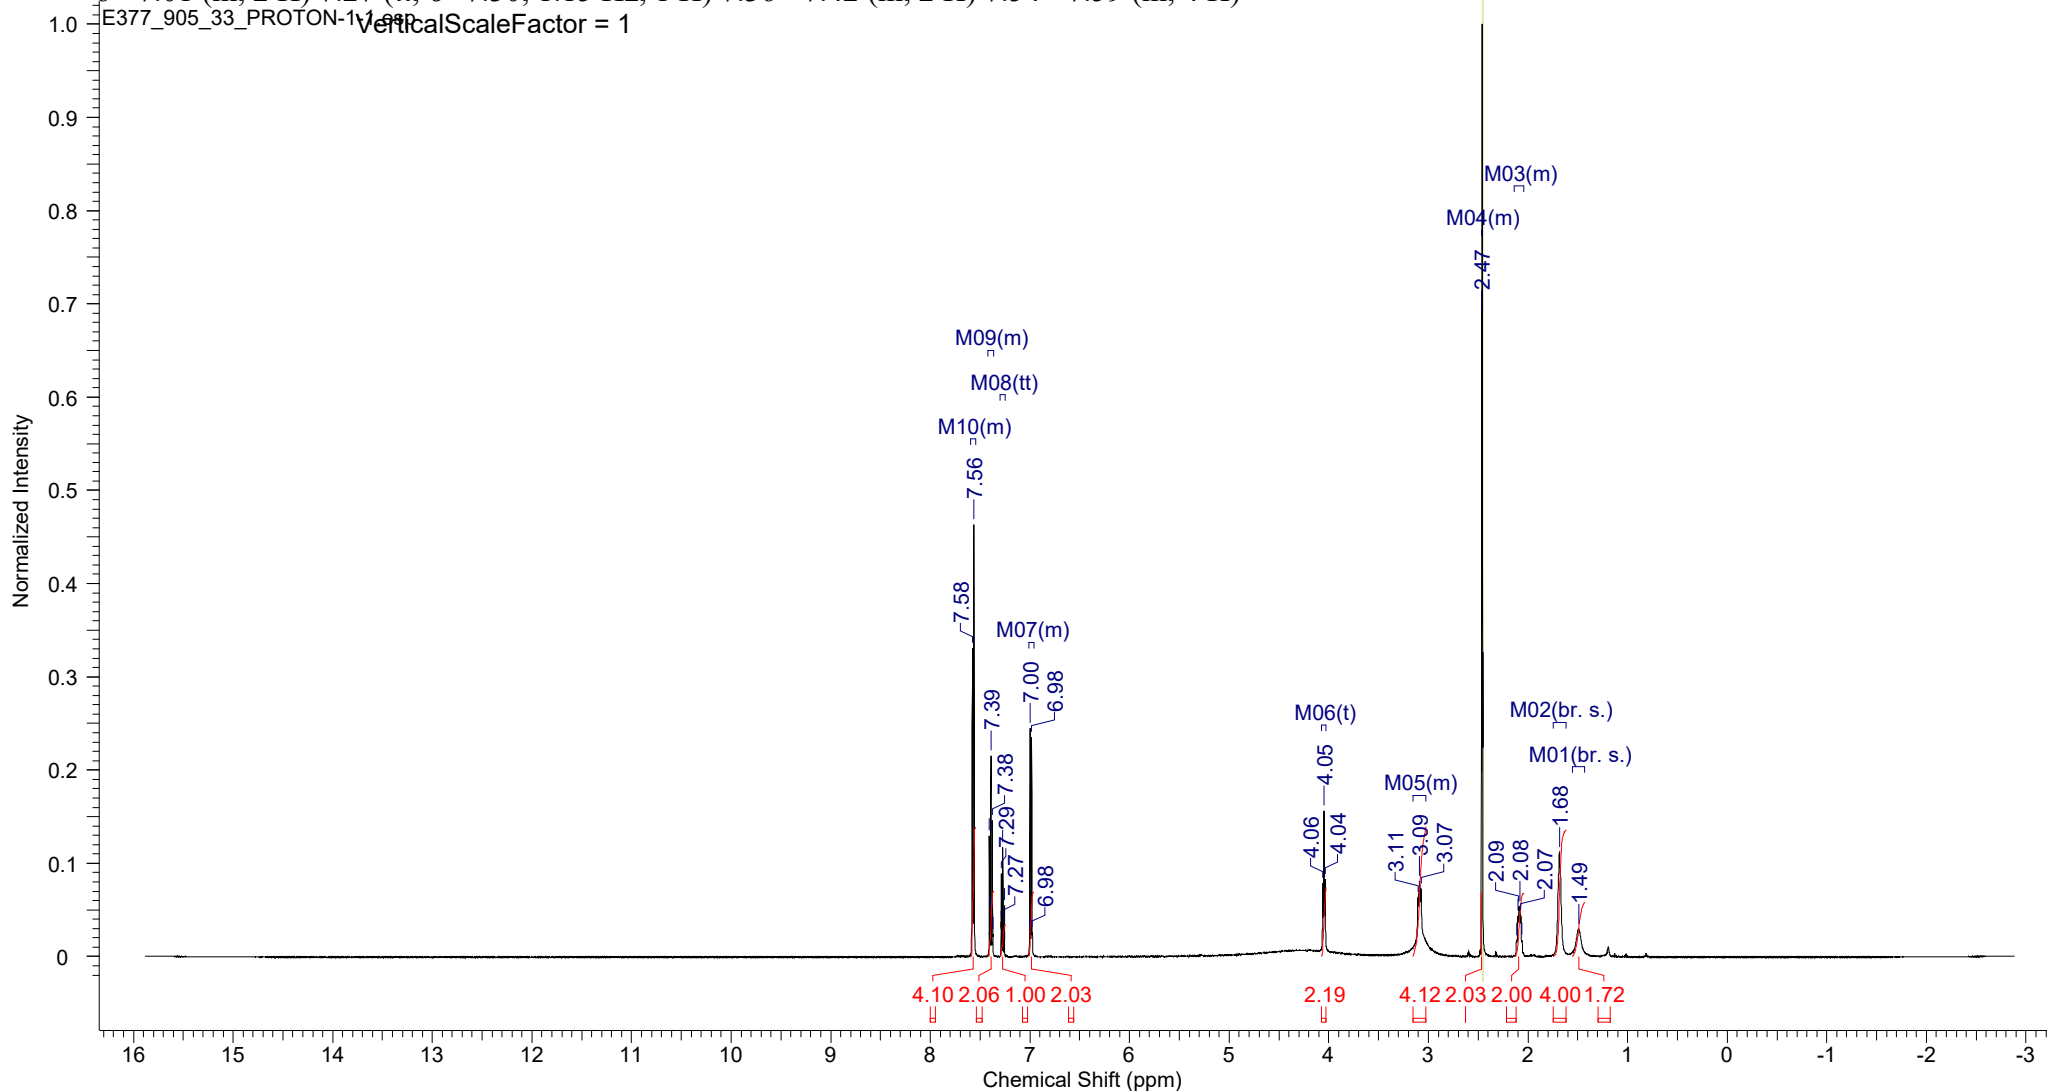

# Cpd11

|                               |                                                   |                              |                      |                         |                      |                               |        |                       |            |
|-------------------------------|---------------------------------------------------|------------------------------|----------------------|-------------------------|----------------------|-------------------------------|--------|-----------------------|------------|
| <b>Acquisition Time (sec)</b> | 1.6568                                            | <b>Date</b>                  | 30 Oct 2020 11:50:08 | <b>Date Stamp</b>       | 30 Oct 2020 10:58:27 |                               |        |                       |            |
| <b>File Name</b>              | C:\Users\turbo\Desktop\E377_905_33 CARBON-1-1.jdf | <b>Frequency (MHz)</b>       | 125.77               | <b>Nucleus</b>          | 13C                  | <b>Number of Transients</b>   | 1024   |                       |            |
| <b>Origin</b>                 | ECA                                               | <b>Original Points Count</b> | 65536                | <b>Owner</b>            | delta                | <b>Points Count</b>           | 65536  | <b>Pulse Sequence</b> | carbon.jxp |
| <b>Solvent</b>                | DMSO-d6                                           | <b>Spectrum Offset (Hz)</b>  | 12576.5293           | <b>Sweep Width (Hz)</b> | 39556.96             | <b>Temperature (degree C)</b> | 22.500 |                       |            |

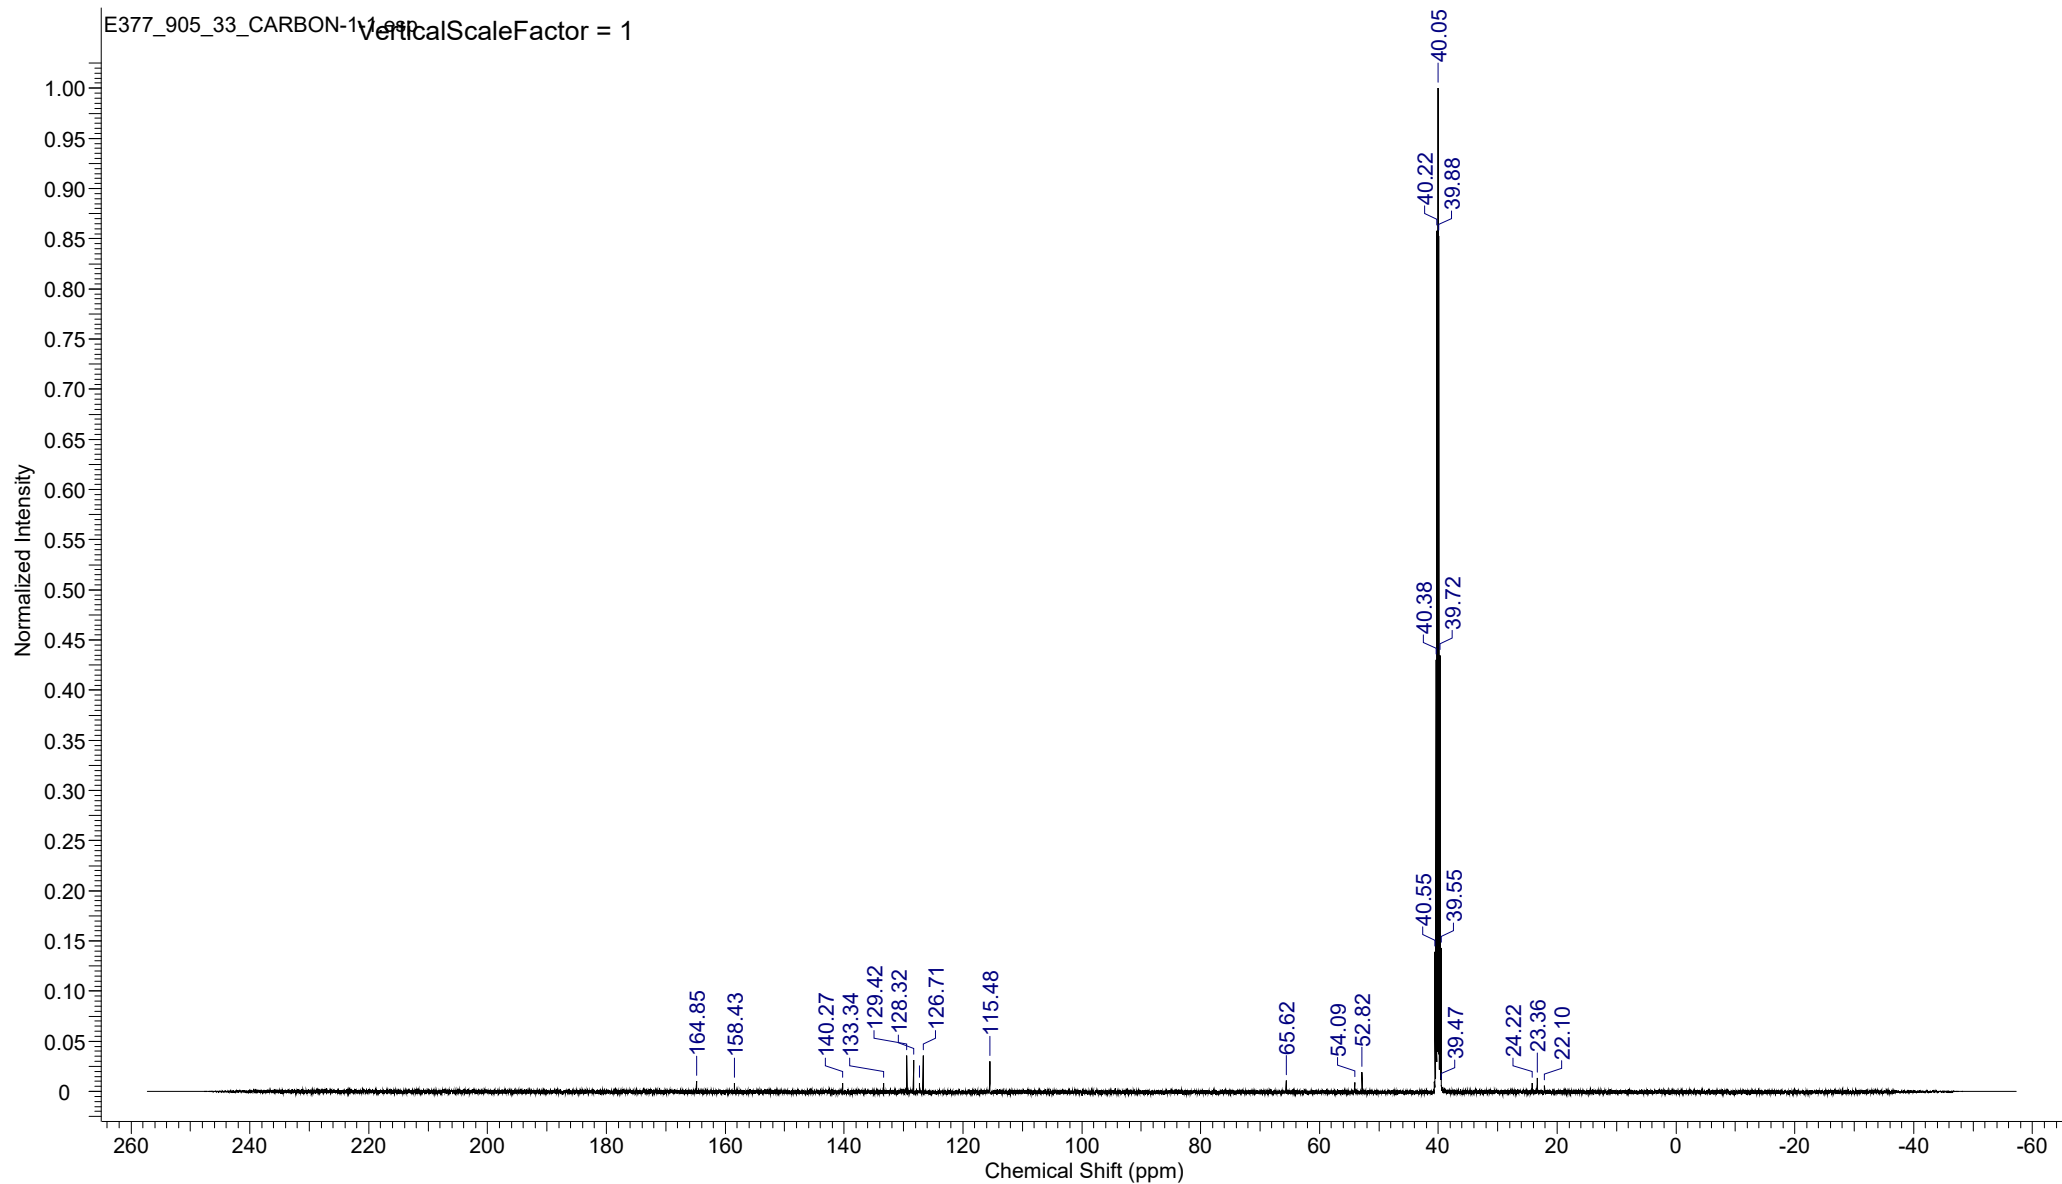

## Cpd12

|                               |                                                   |                |                      |                               |                      |
|-------------------------------|---------------------------------------------------|----------------|----------------------|-------------------------------|----------------------|
| <b>Acquisition Time (sec)</b> | 3.4918                                            | <b>Date</b>    | 24 Jun 2021 08:39:15 | <b>Date Stamp</b>             | 24 Jun 2021 08:38:27 |
| <b>File Name</b>              | C:\Users\turbo\Desktop\W232_905_33_PROTON-1-1.jdf |                |                      | <b>Frequency (MHz)</b>        | 500.16               |
| <b>Number of Transients</b>   | 8                                                 | <b>Origin</b>  | ECA                  | <b>Original Points Count</b>  | 32768                |
| <b>Pulse Sequence</b>         | proton.jxp                                        | <b>Solvent</b> | DMSO-d6              | <b>Spectrum Offset (Hz)</b>   | 3251.0396            |
|                               |                                                   |                |                      | <b>Sweep Width (Hz)</b>       | 9384.38              |
|                               |                                                   |                |                      | <b>Temperature (degree C)</b> | 21.000               |

$^1\text{H}$  NMR (500 MHz, DMSO- $d_6$ )  $\delta$  ppm 1.49 (br. s., 2 H) 1.65 - 1.74 (m, 4 H) 2.08 - 2.17 (m, 2 H) 2.95 - 3.19 (m, 6 H) 4.11 (t,  $J=6.16$  Hz, 2 H) 7.03 - 7.08 (m, 2 H) 7.49 - 7.54 (m, 2 H) 7.60 - 7.66 (m, 3 H) 7.69 - 7.73 (m, 2 H)

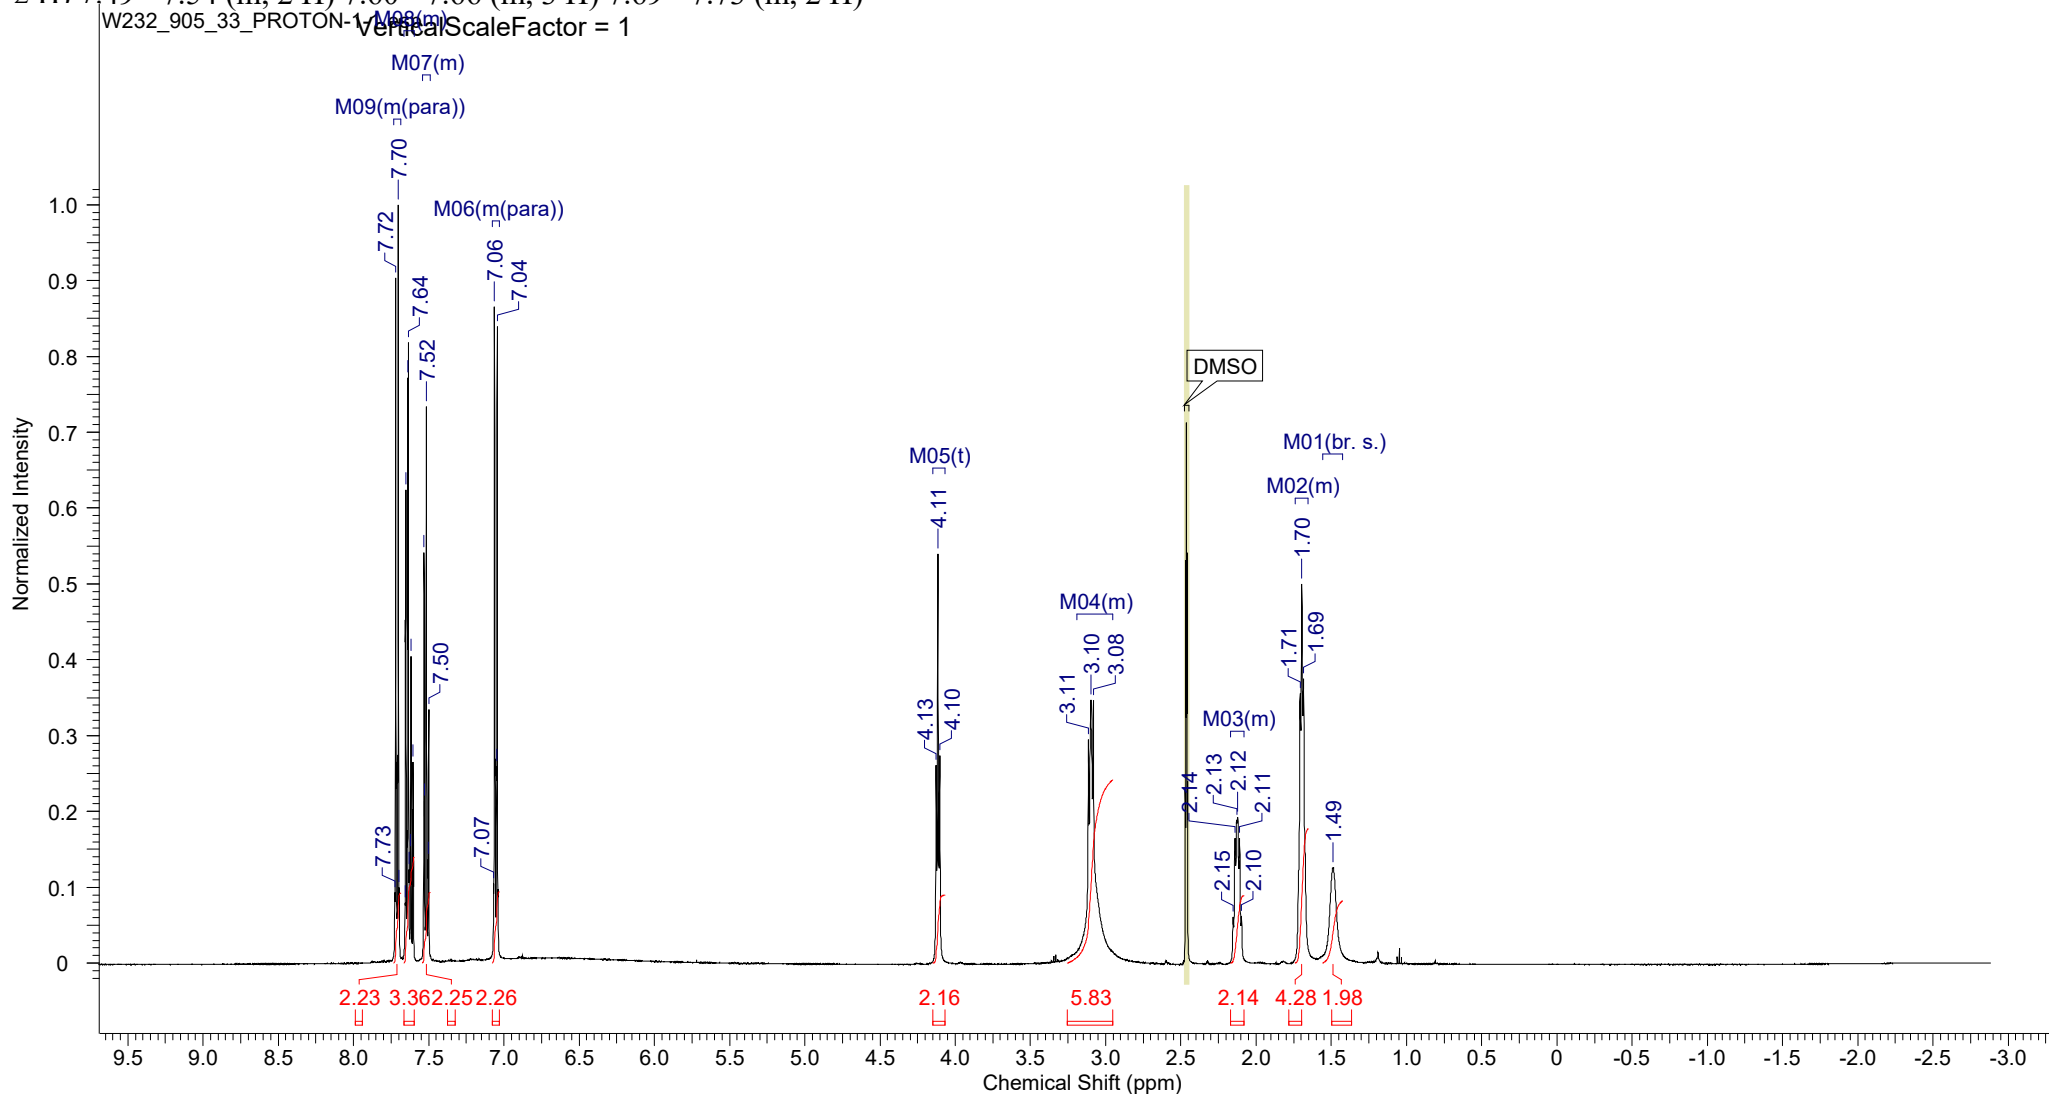

# Cpd12

|                               |                                                   |                              |                      |                         |                      |                               |        |
|-------------------------------|---------------------------------------------------|------------------------------|----------------------|-------------------------|----------------------|-------------------------------|--------|
| <b>Acquisition Time (sec)</b> | 1.6568                                            | <b>Date</b>                  | 24 Jun 2021 09:31:35 | <b>Date Stamp</b>       | 24 Jun 2021 08:39:46 |                               |        |
| <b>File Name</b>              | C:\Users\turbo\Desktop\W232_905_33 CARBON-1-1.jdf | <b>Frequency (MHz)</b>       | 125.77               | <b>Nucleus</b>          | 13C                  | <b>Number of Transients</b>   | 1024   |
| <b>Origin</b>                 | ECA                                               | <b>Original Points Count</b> | 65536                | <b>Owner</b>            | delta                | <b>Points Count</b>           | 65536  |
| <b>Solvent</b>                | DMSO-d6                                           | <b>Spectrum Offset (Hz)</b>  | 12576.5293           | <b>Sweep Width (Hz)</b> | 39556.96             | <b>Temperature (degree C)</b> | 21.000 |

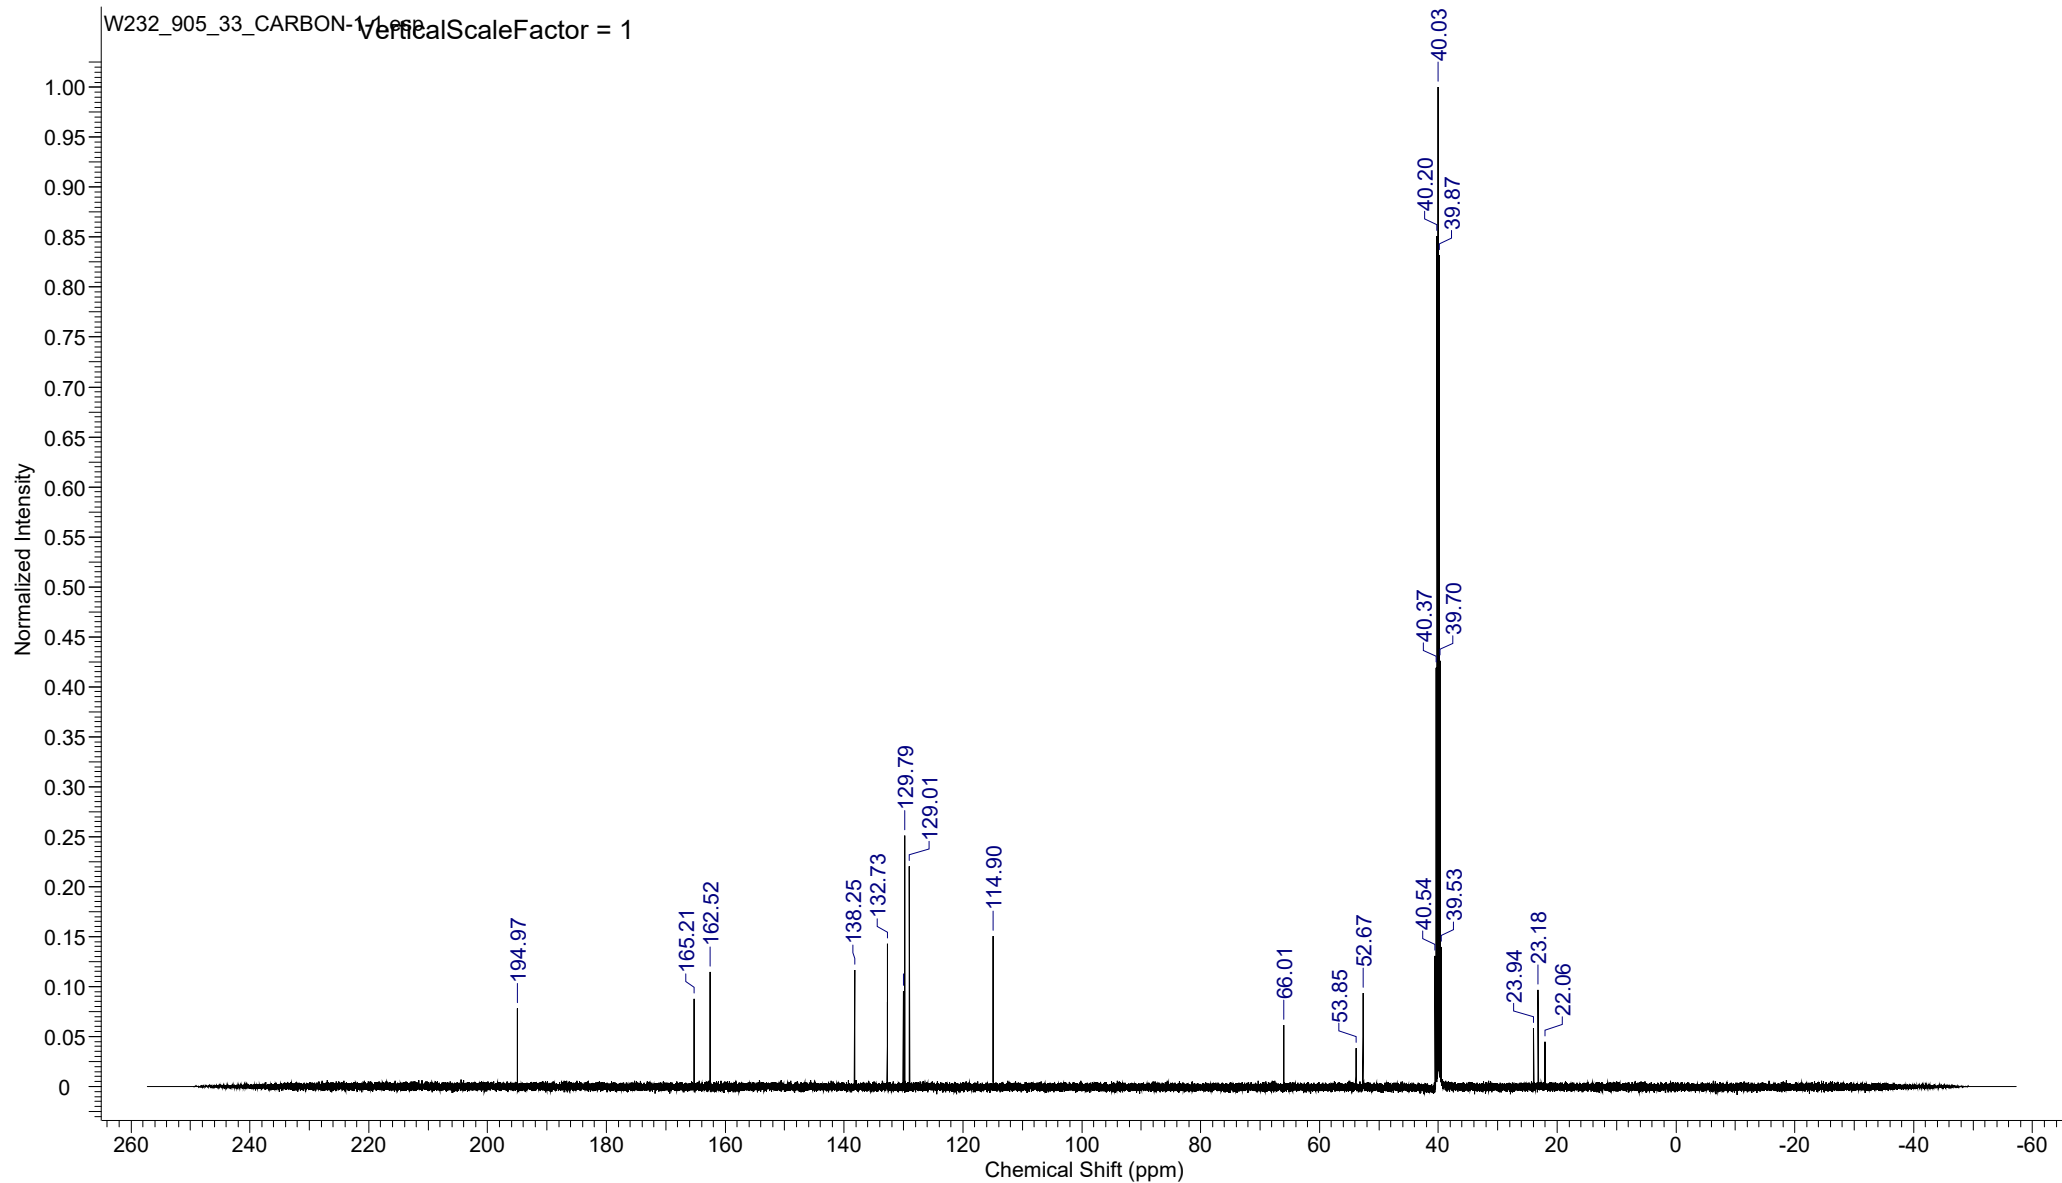

# Cpd1

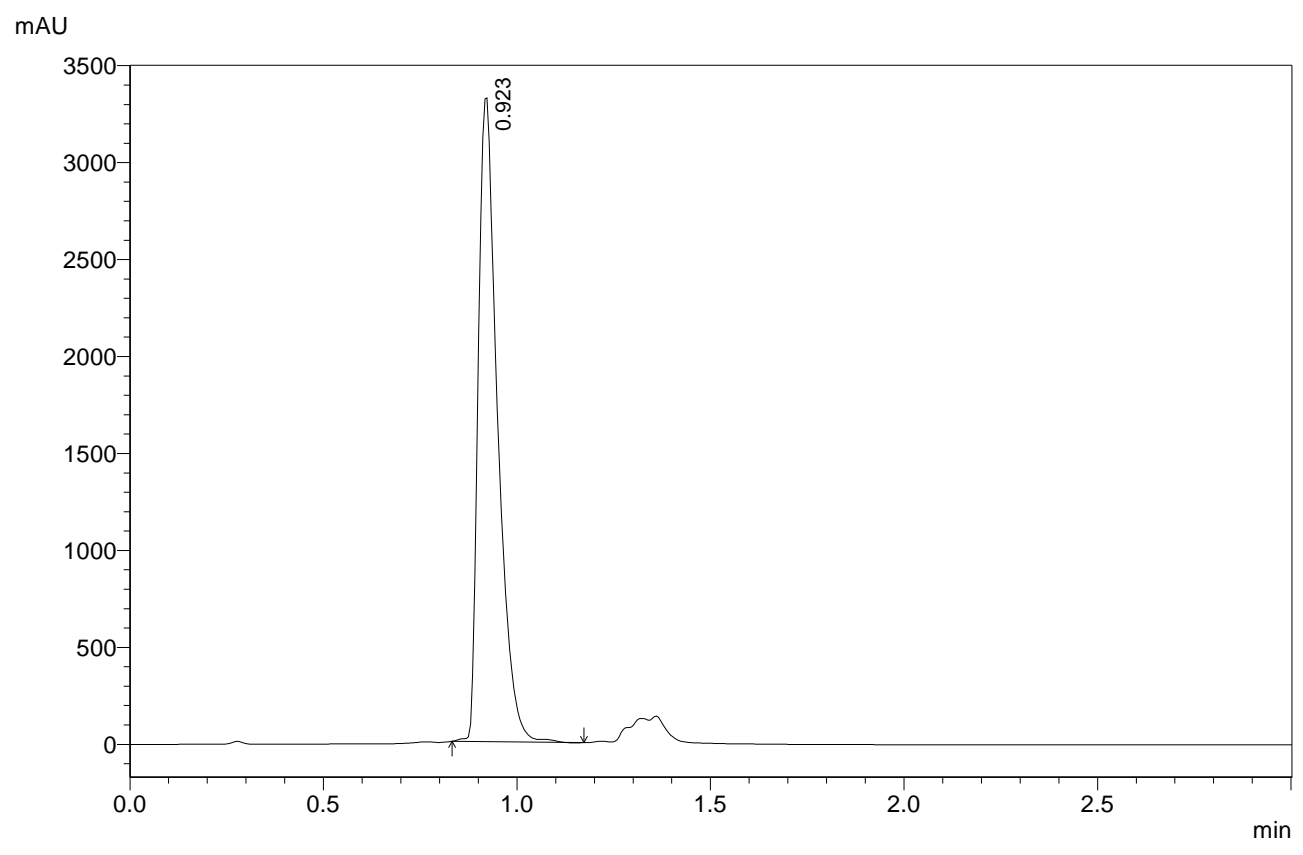

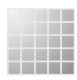

SHIMADZU  
LabSolutions

# Cpd2

## <Chromatogram>

mAU

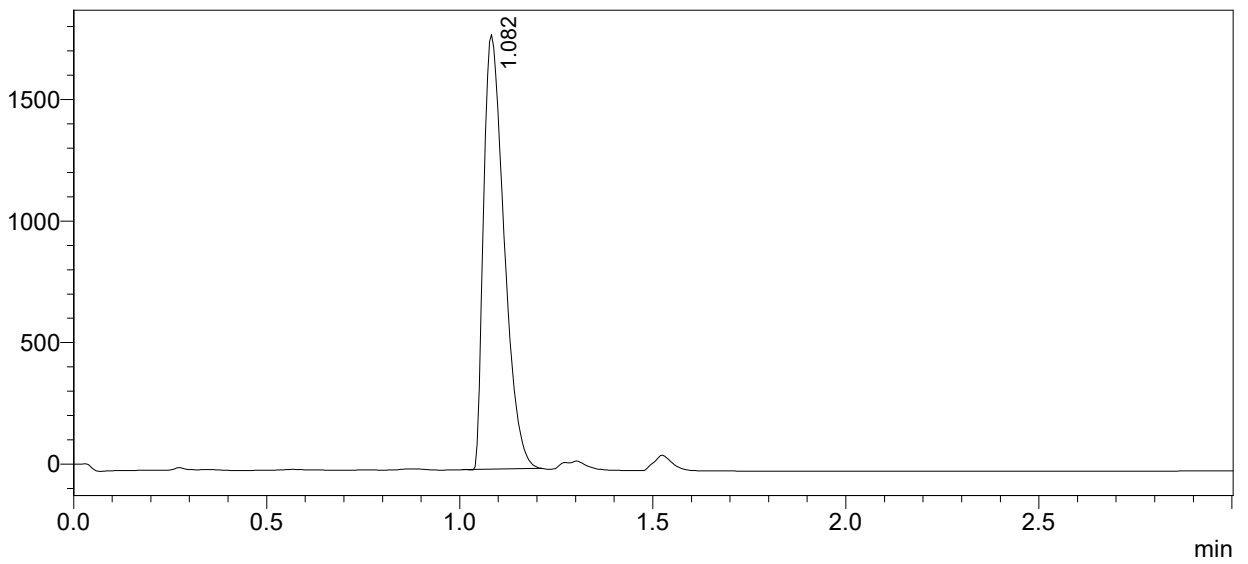

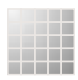

SHIMADZU  
LabSolutions

# Cpd3

## <Chromatogram>

mAU

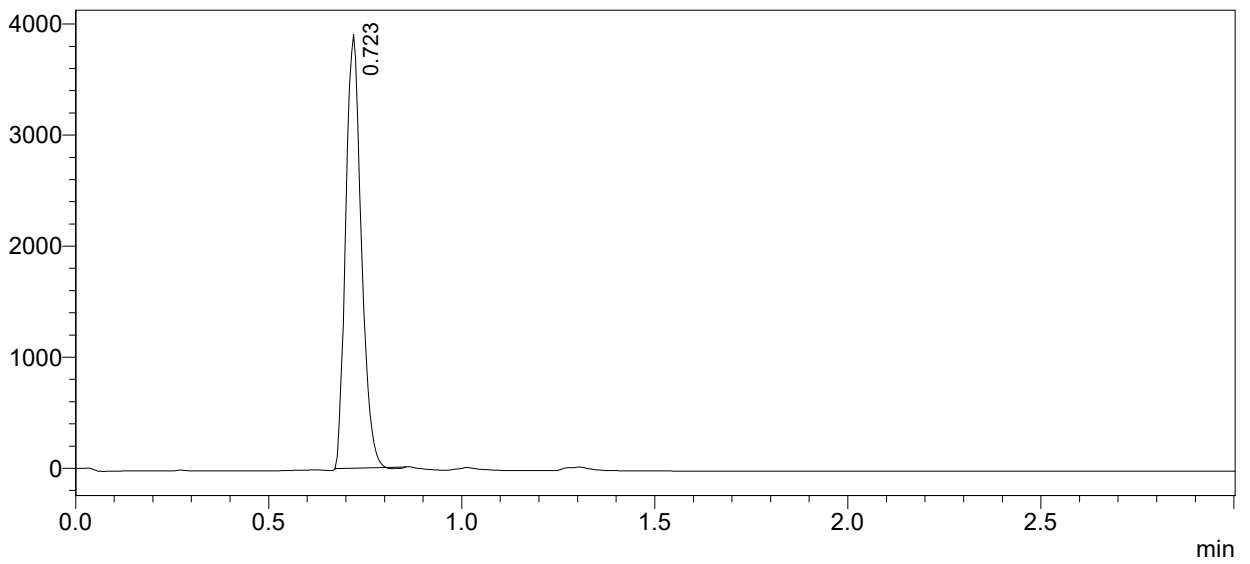



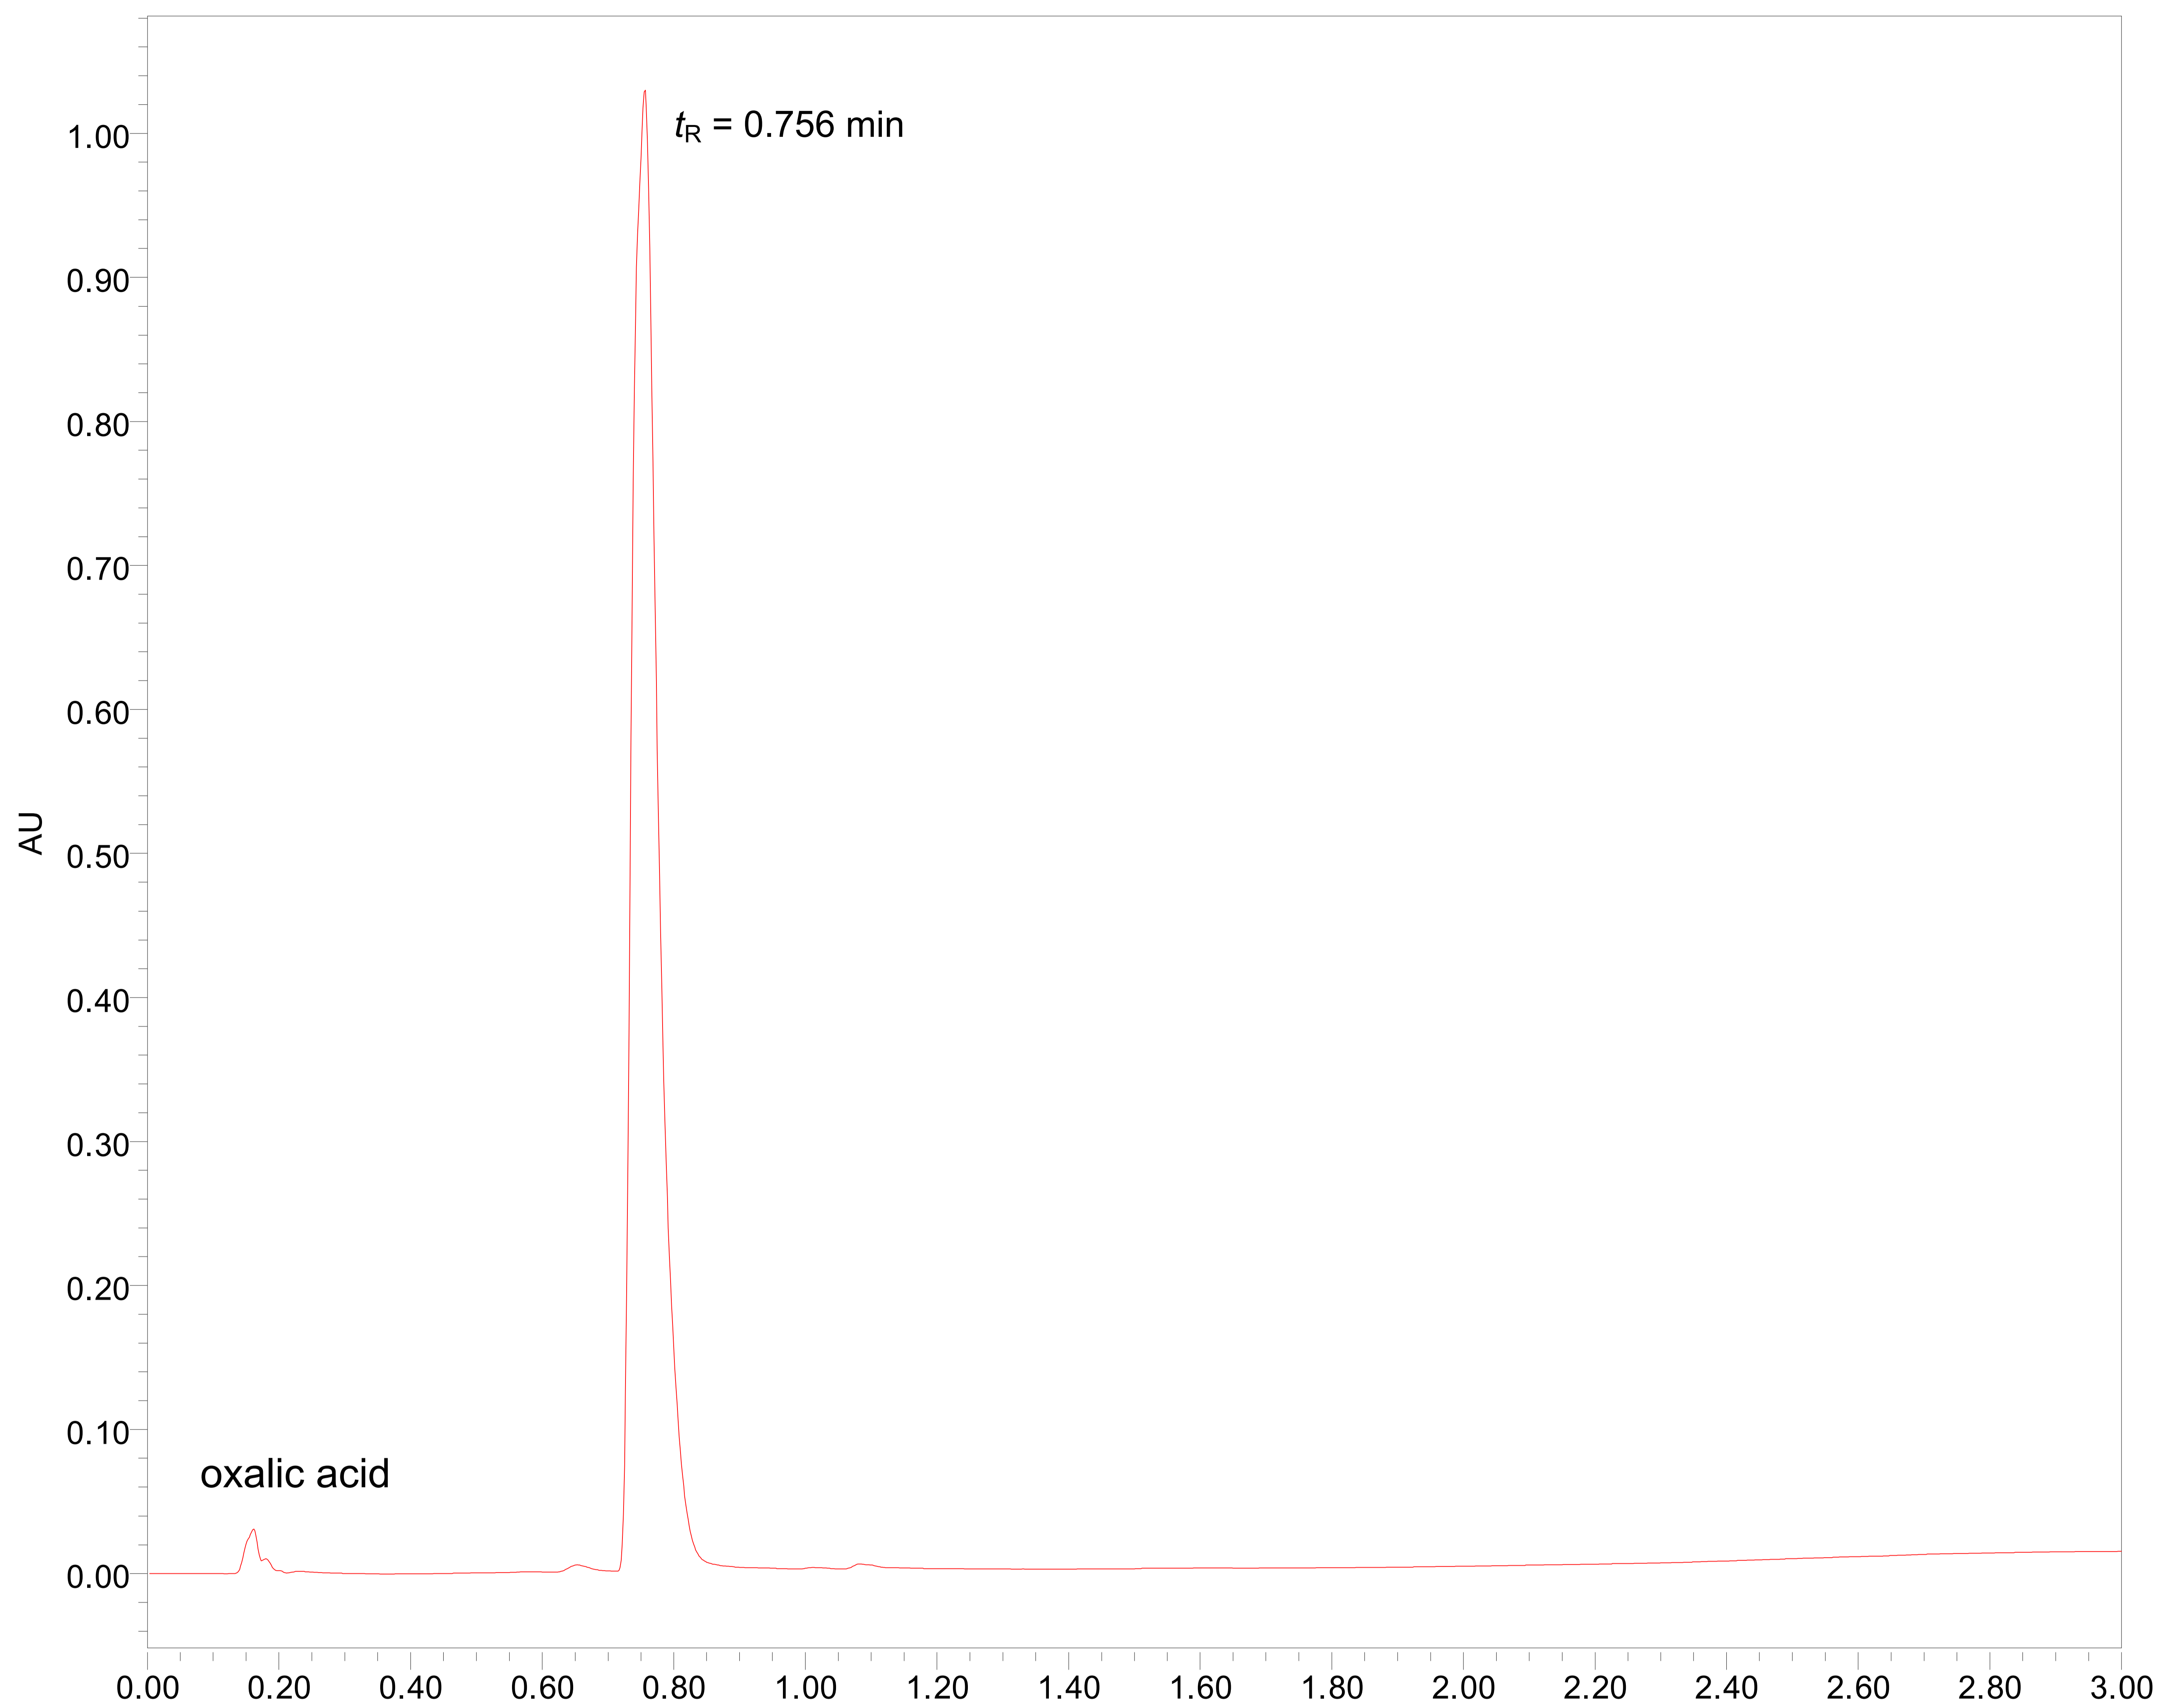

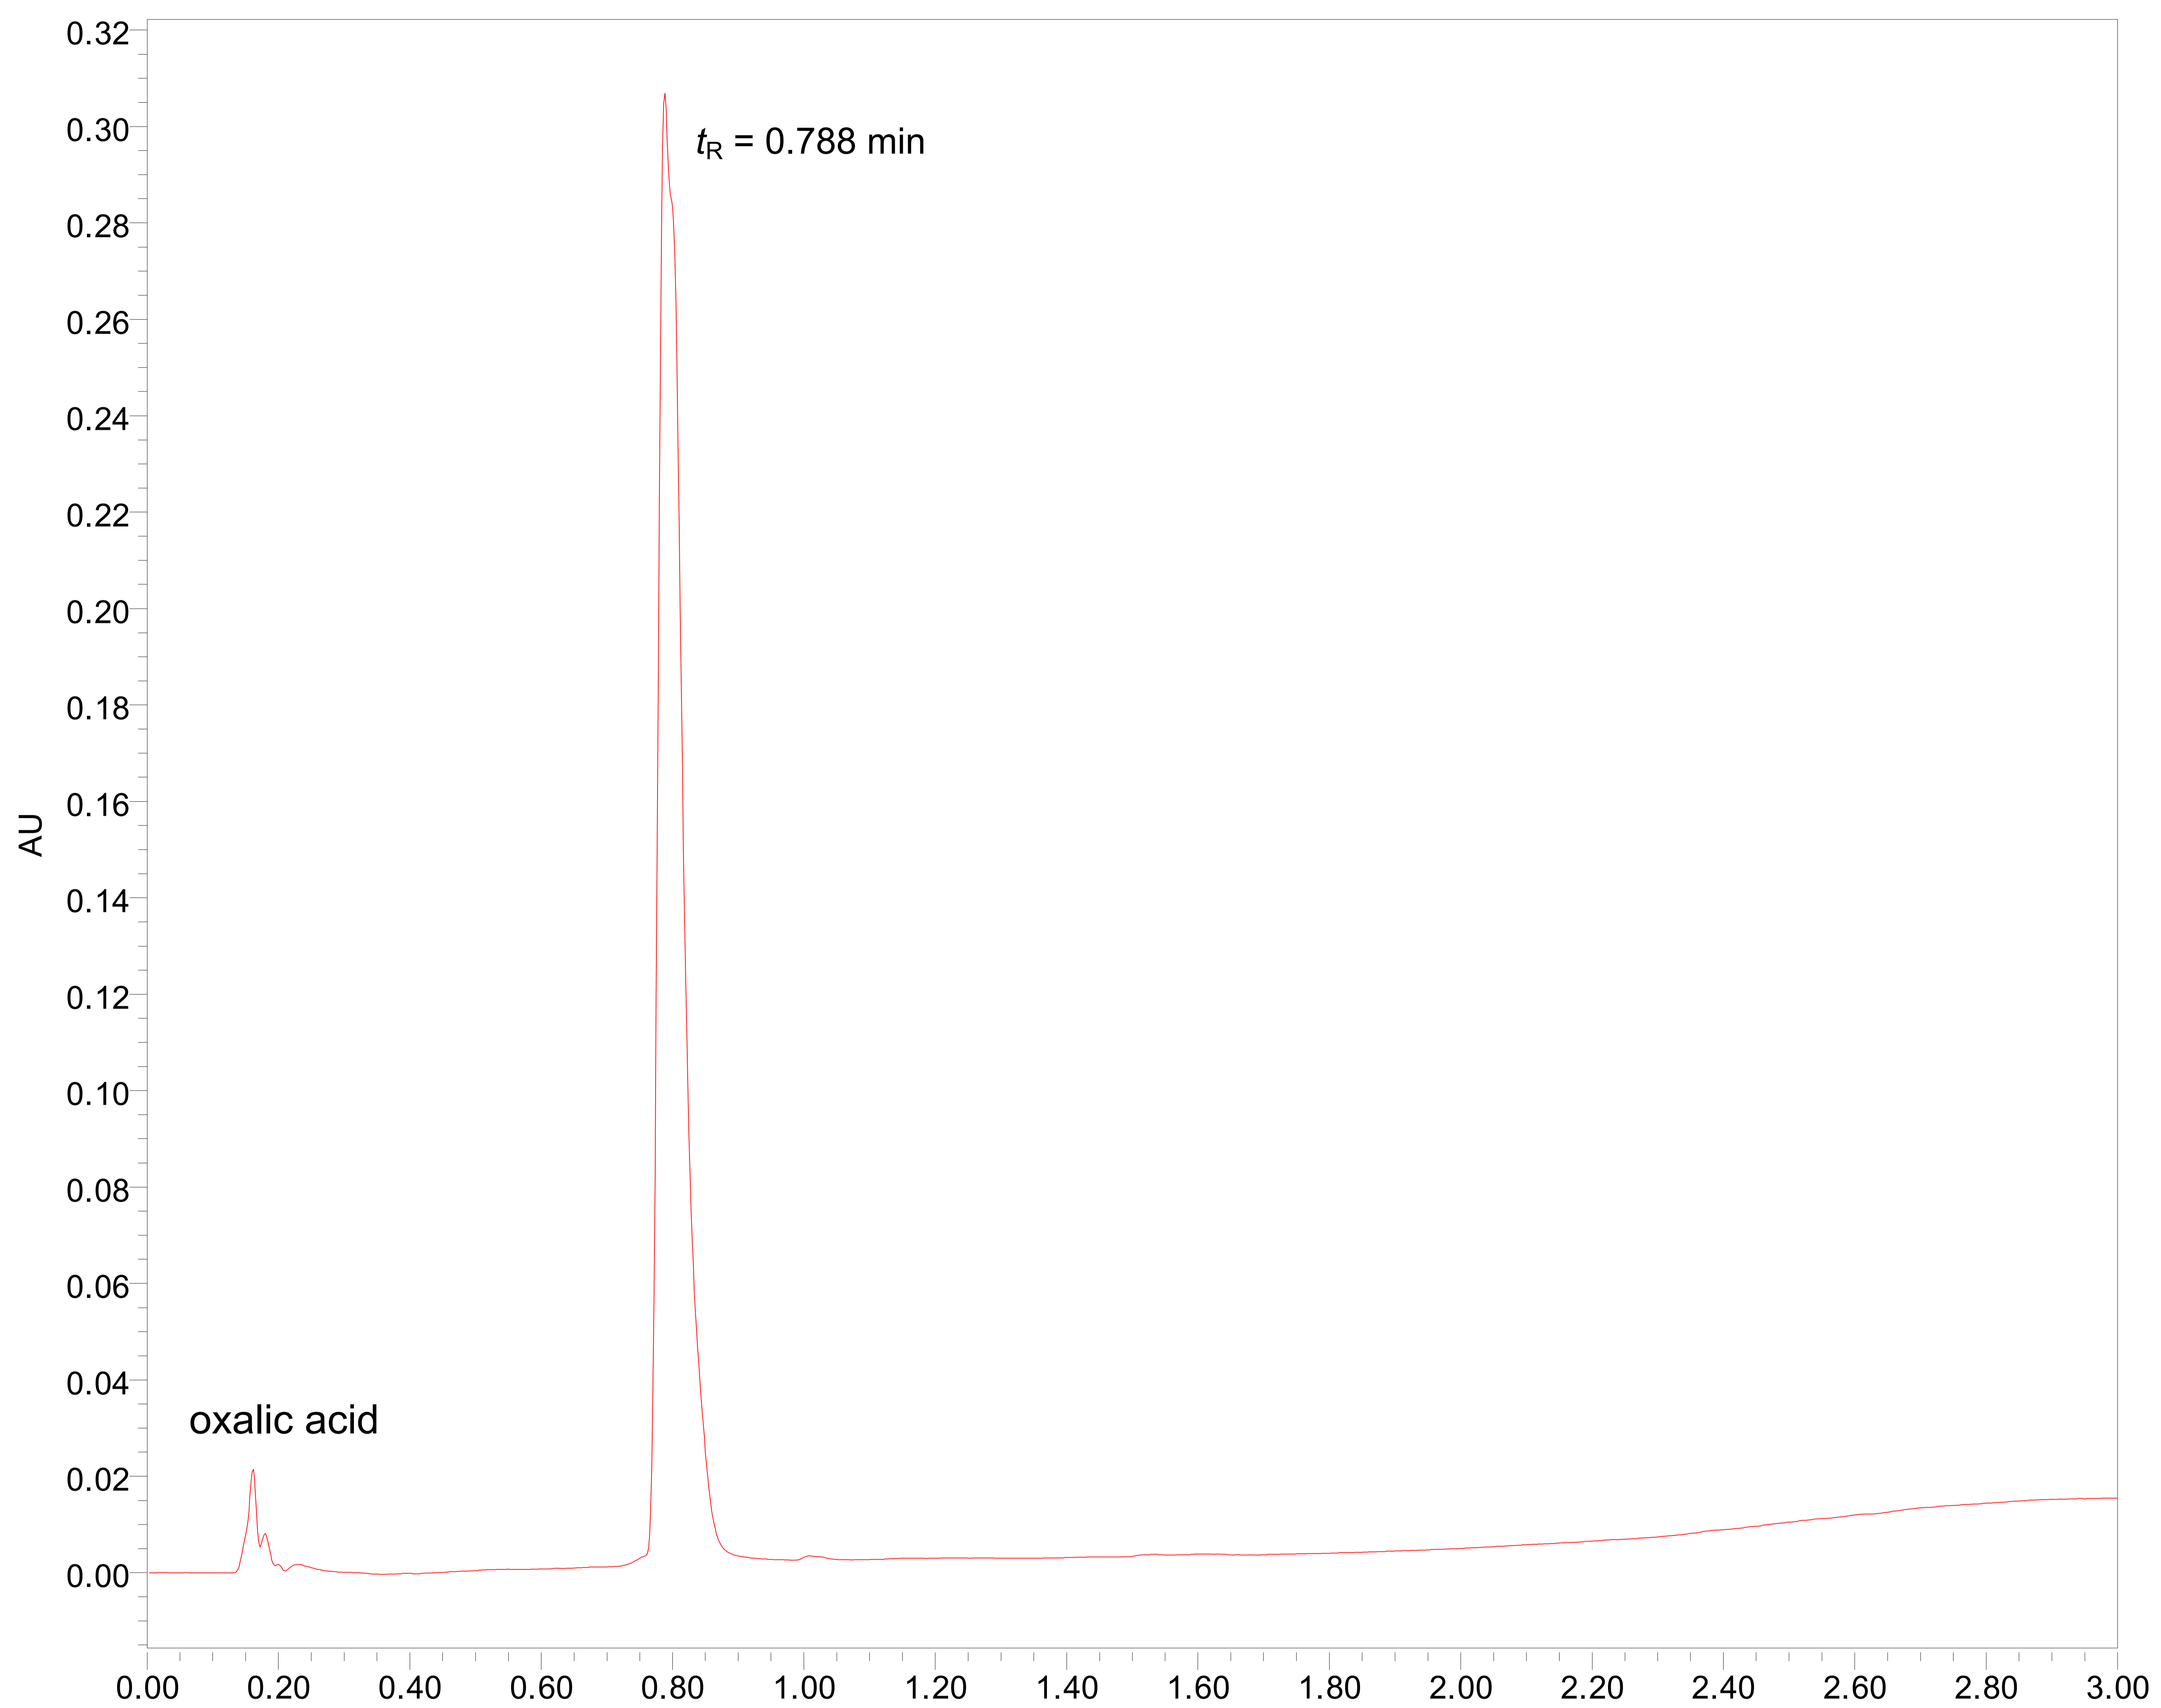



SHIMADZU  
LabSolutions

Cpd6

<Chromatogram>

mAU

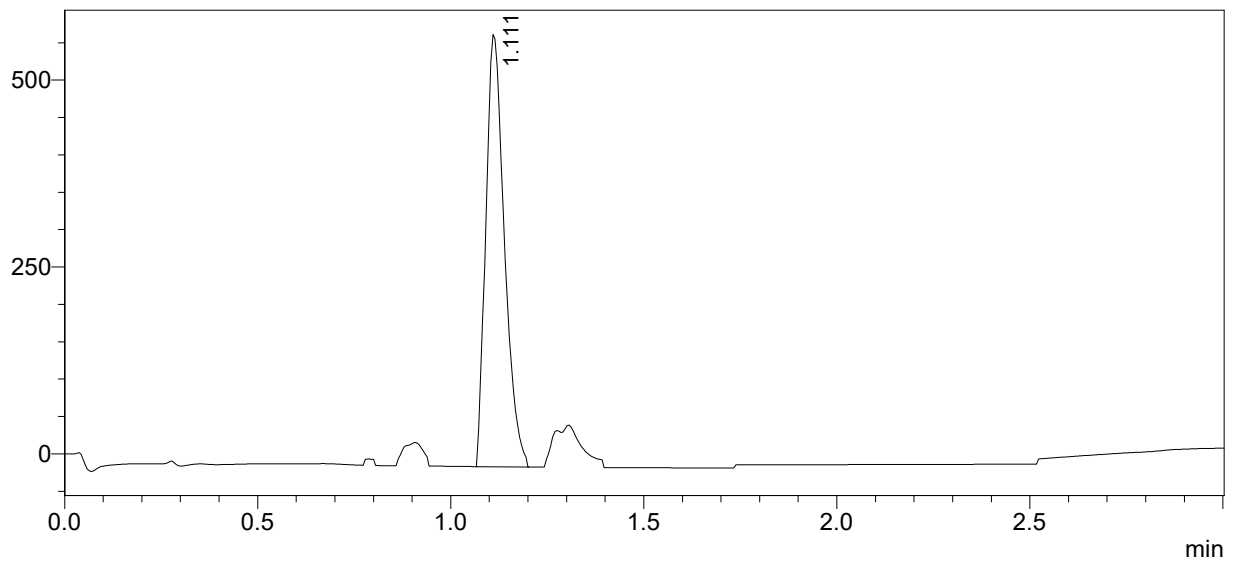

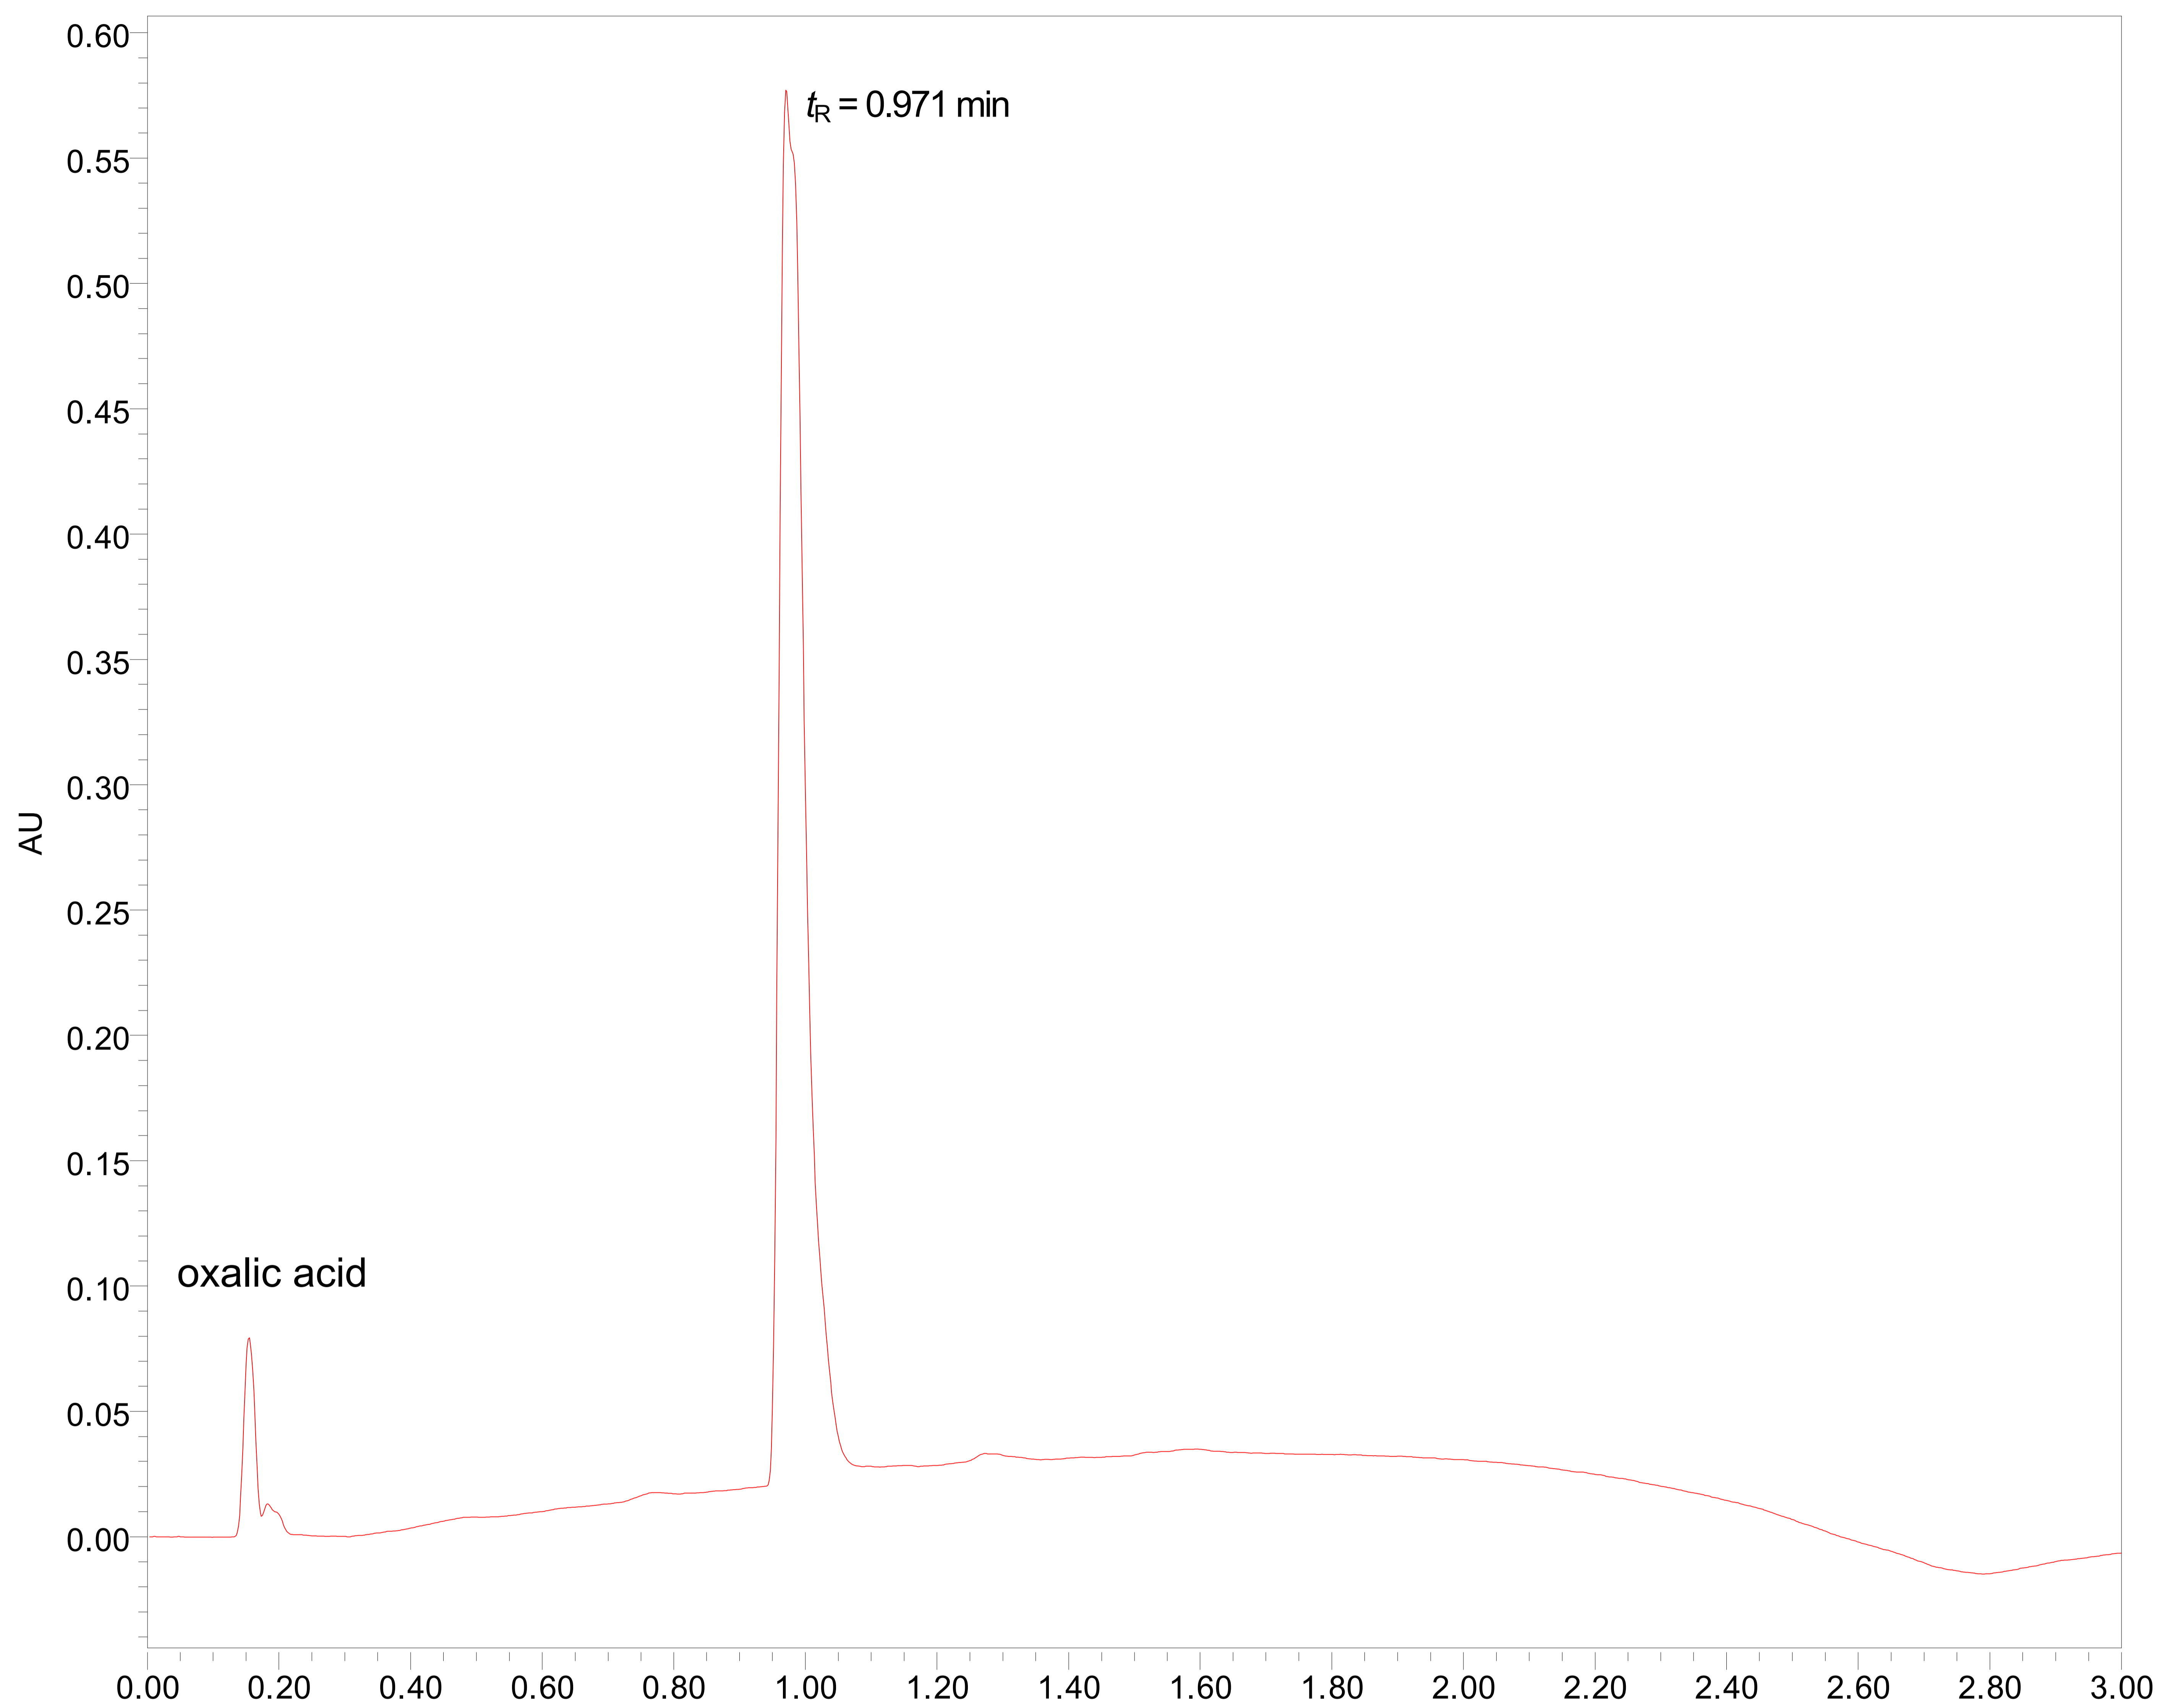



SHIMADZU  
LabSolutions

# Cpd8

## <Chromatogram>

mAU

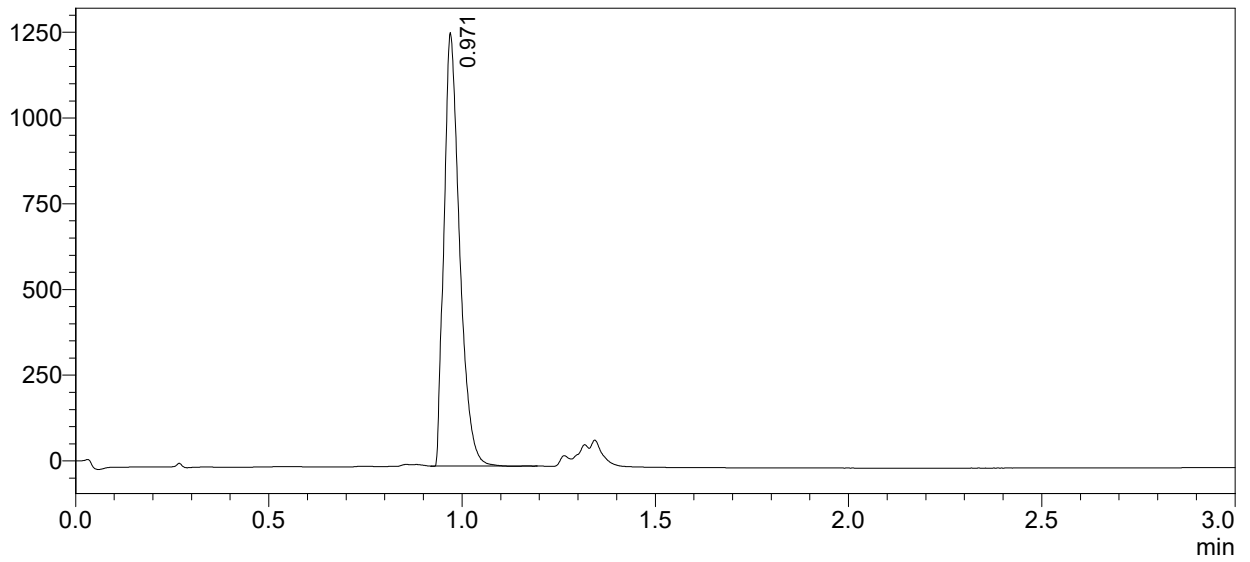

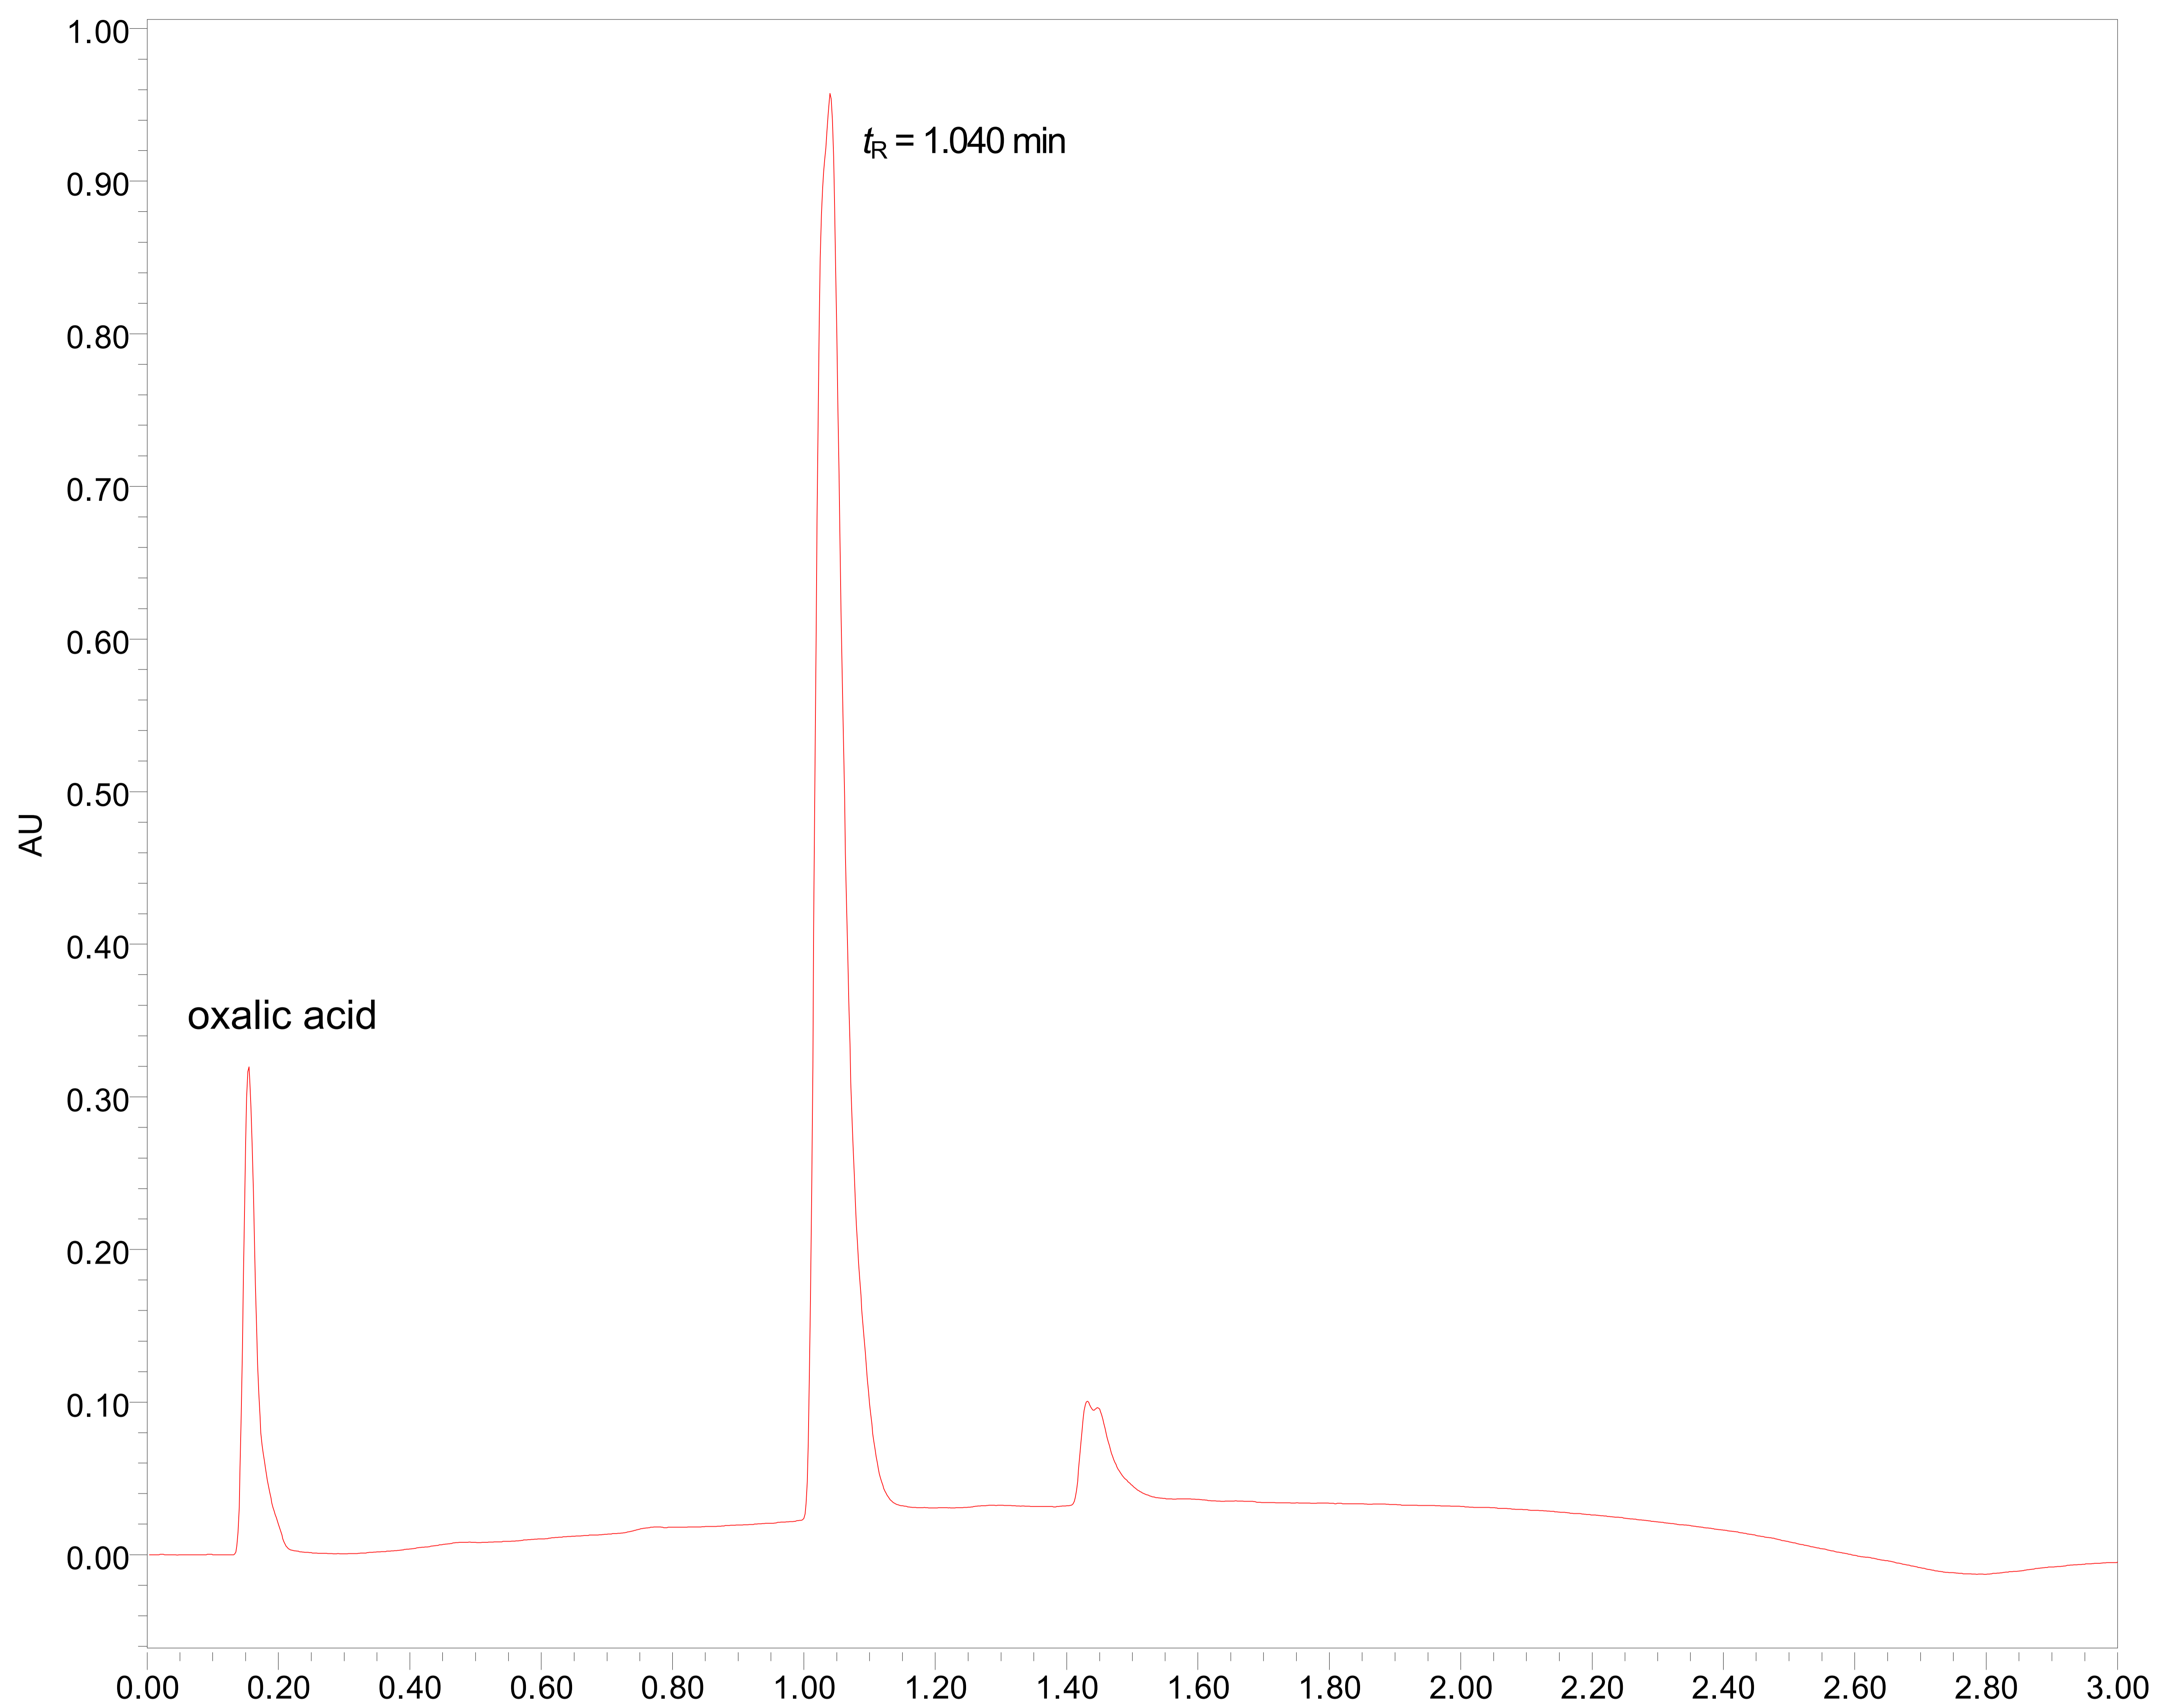

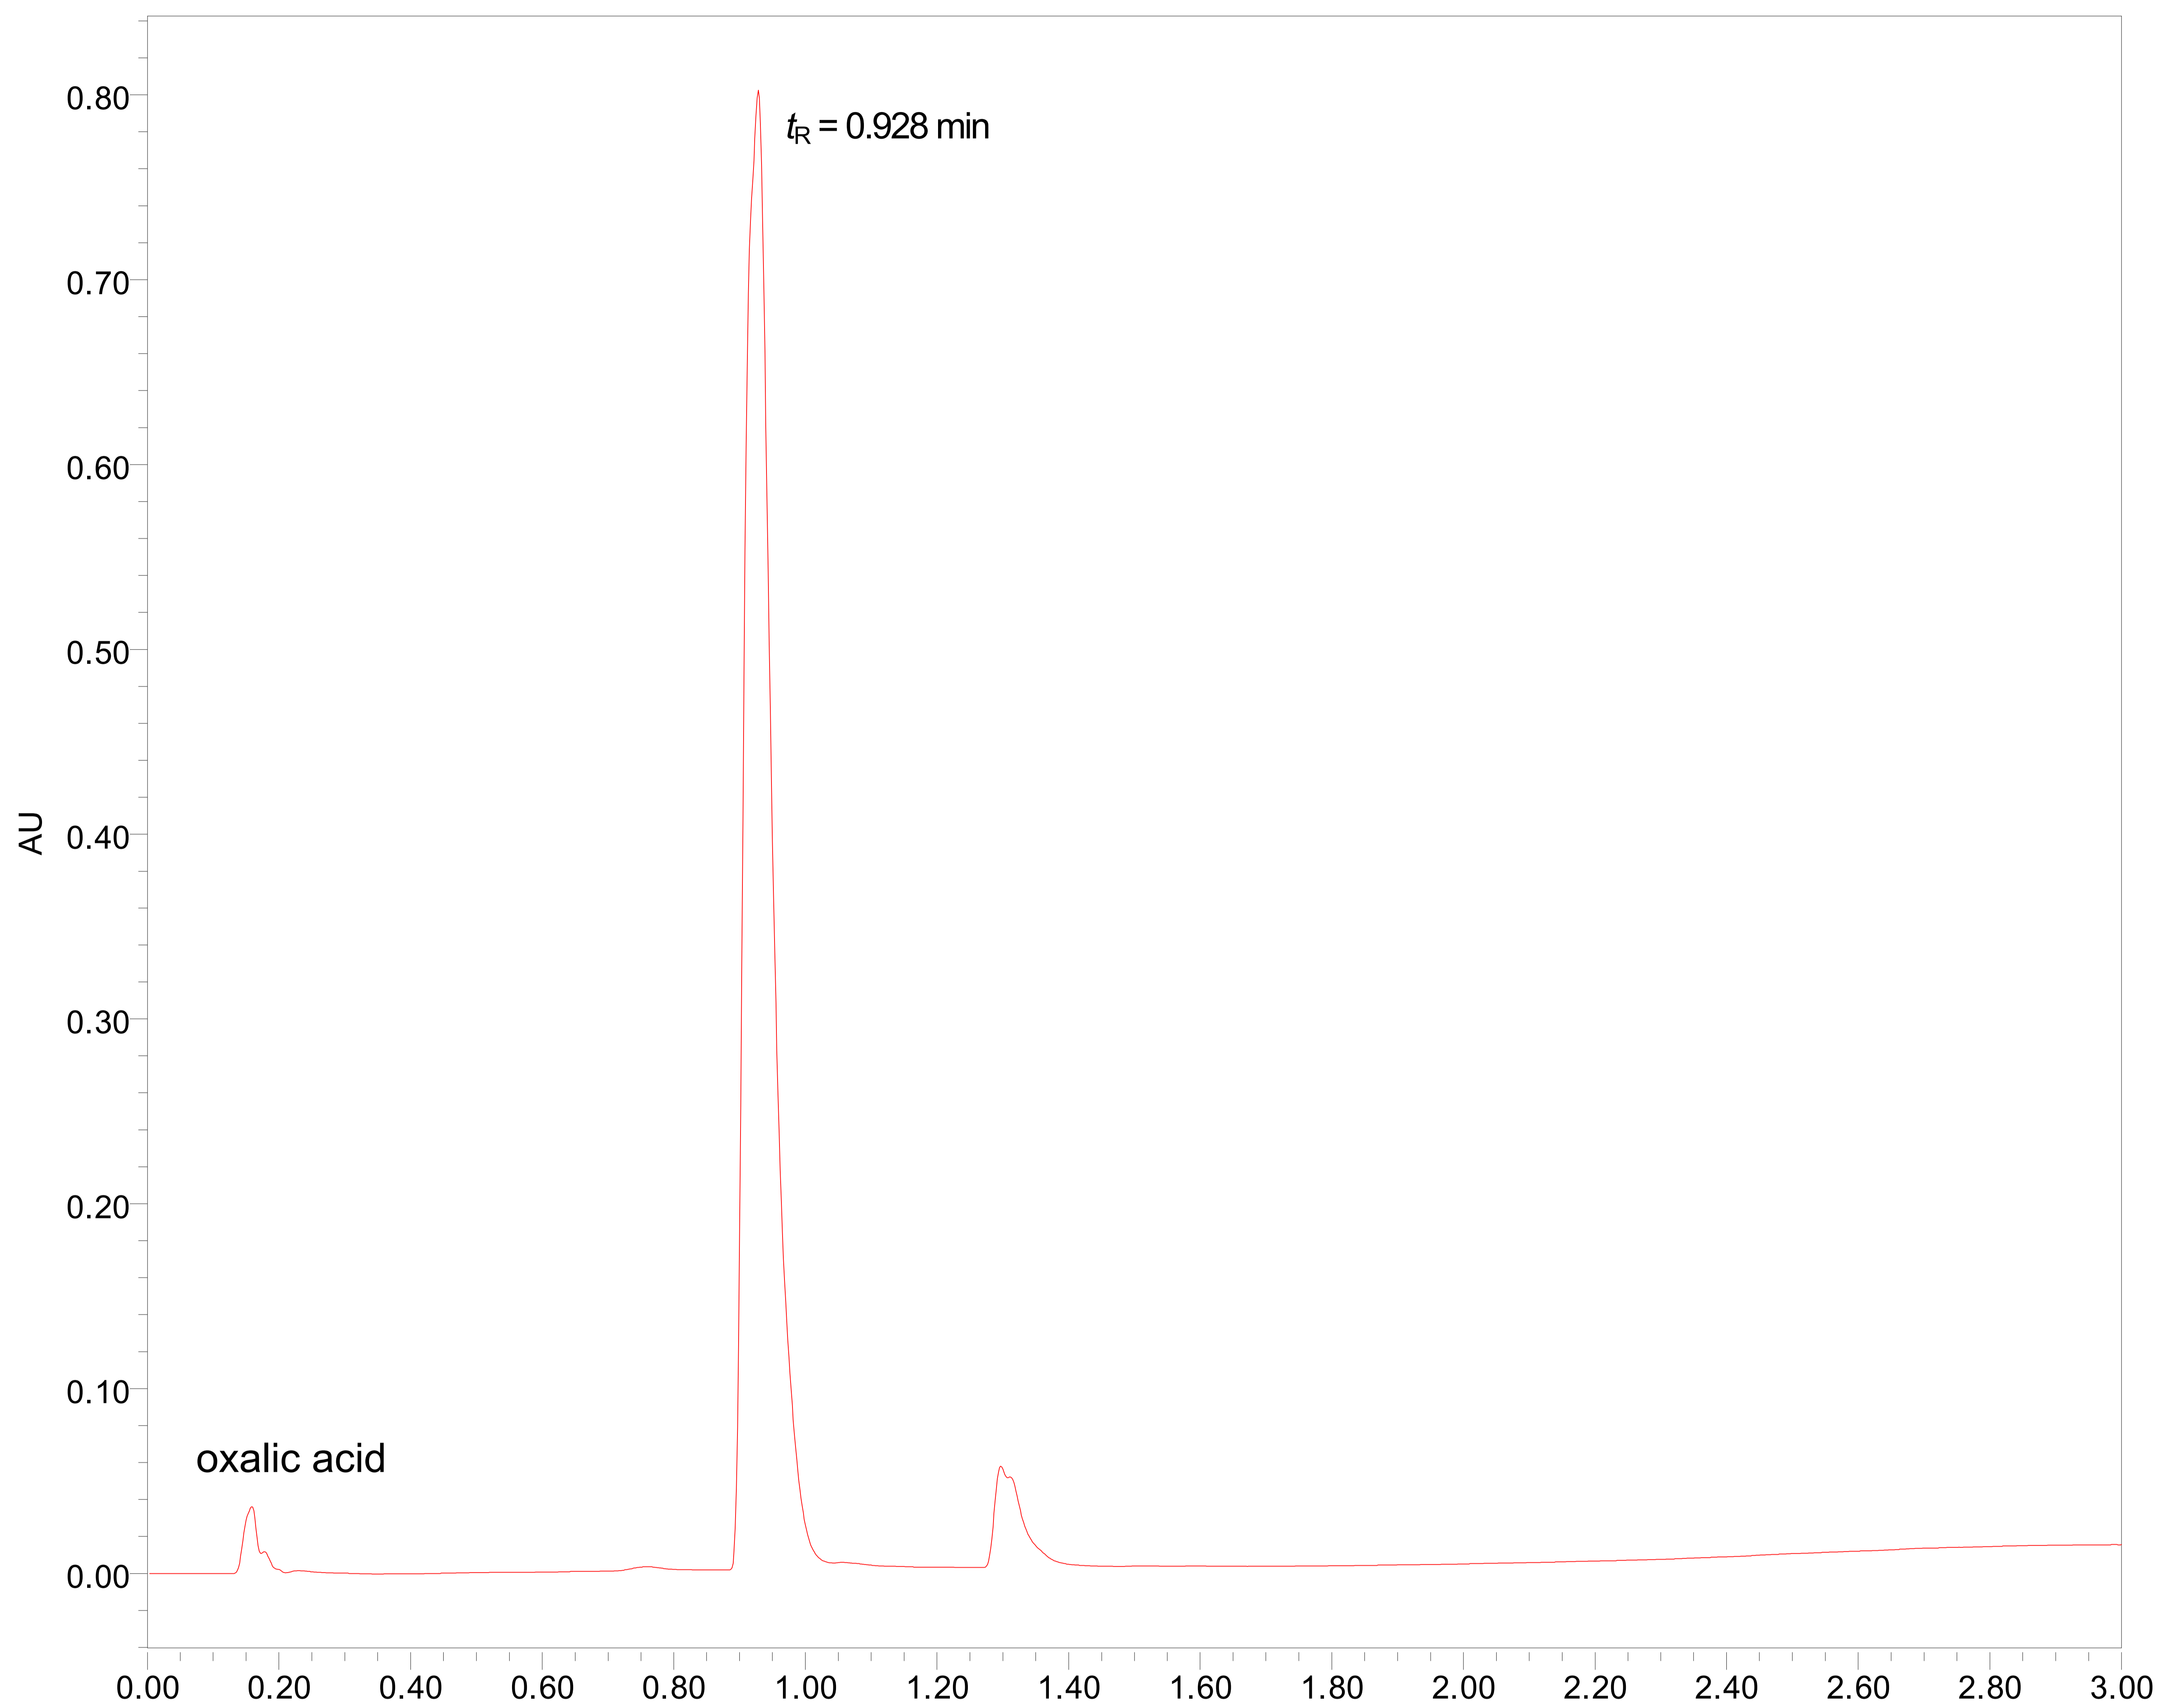



SHIMADZU  
LabSolutions

# Cpd11

## <Chromatogram>

mAU

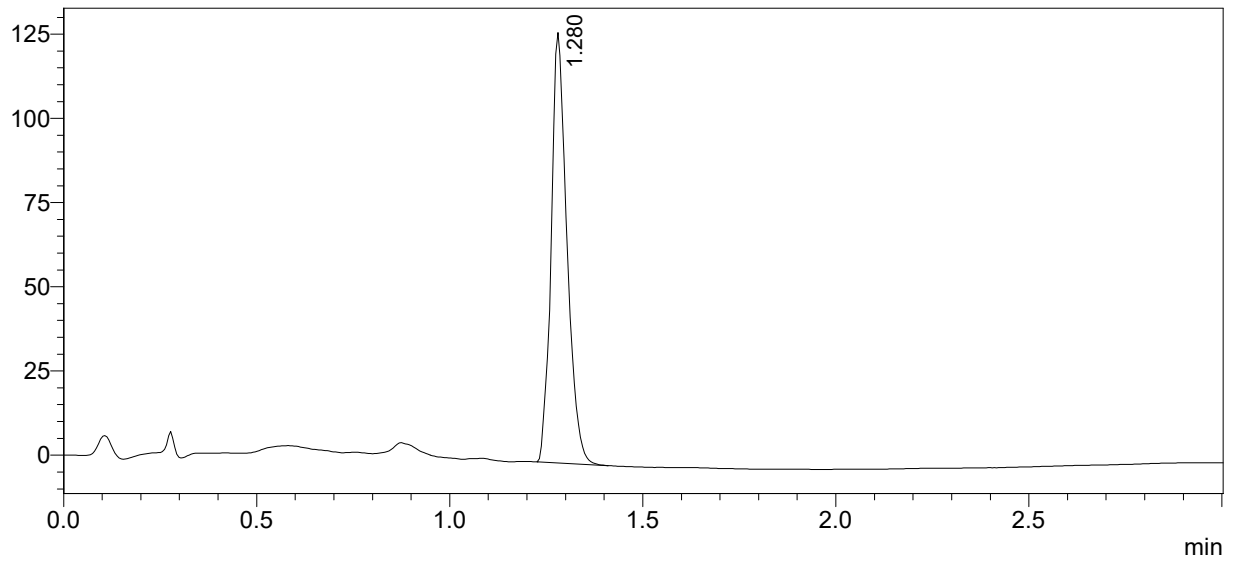





SHIMADZU  
LabSolutions

# Cpd12

## <Chromatogram>

mAU

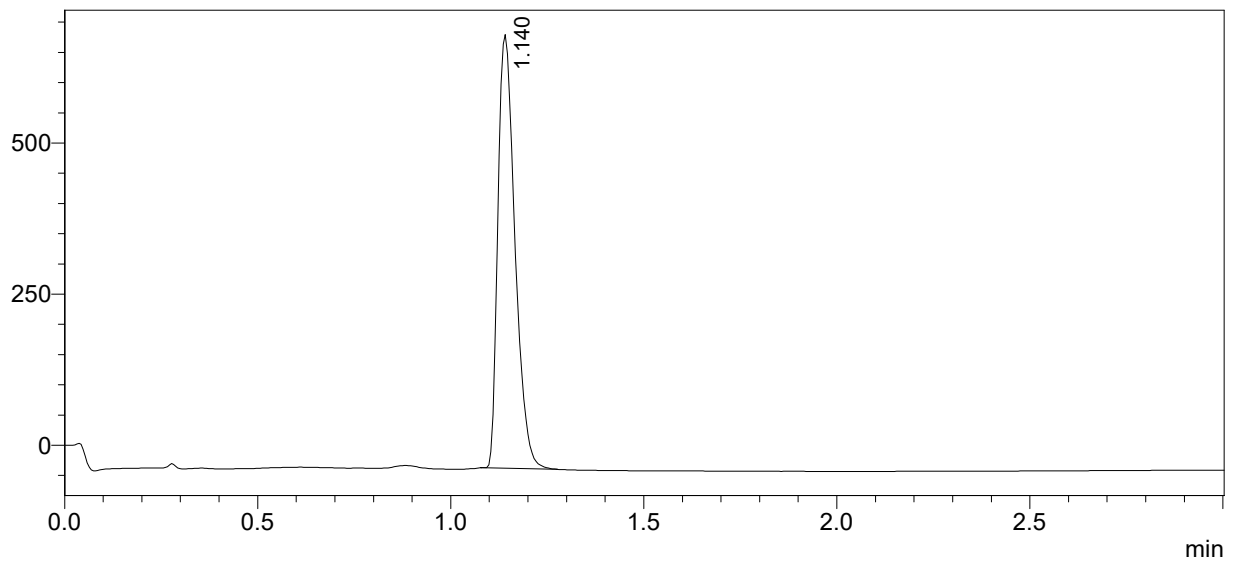



SHIMADZU  
LabSolutions

# Cpd13

## <Chromatogram>

mAU

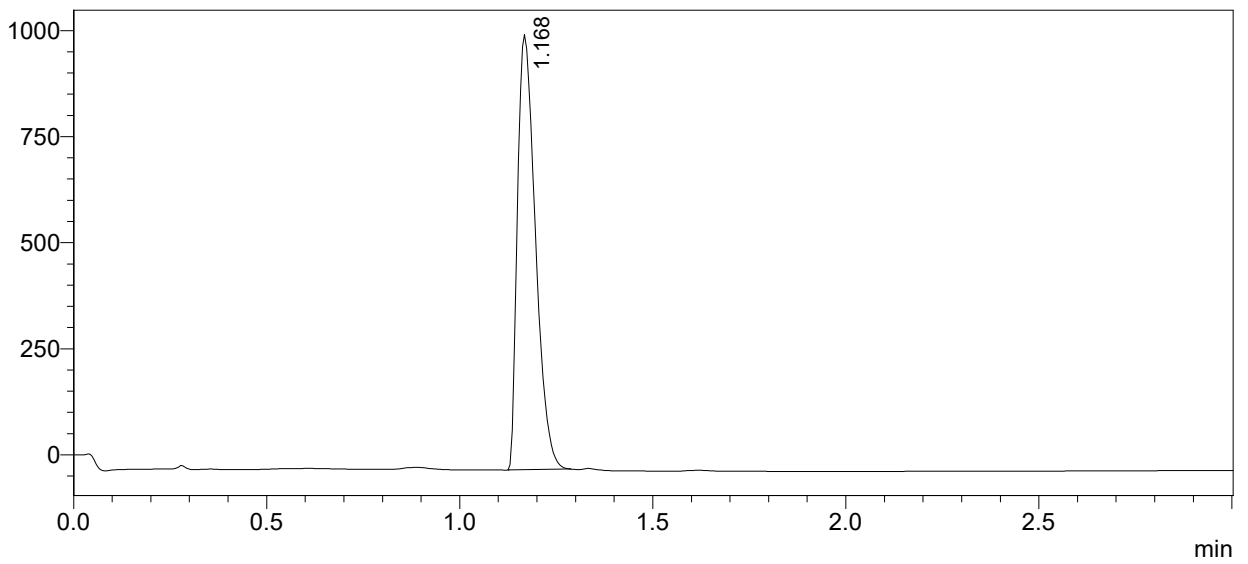



SHIMADZU  
LabSolutions

# Cpd14

---

## <Chromatogram>

mAU

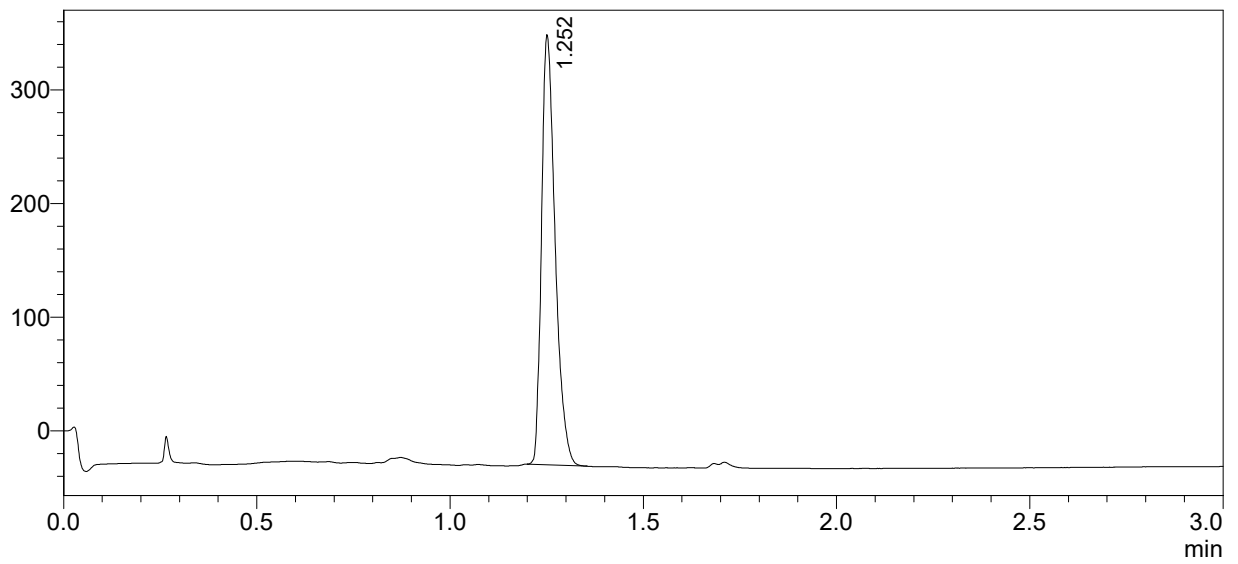



SHIMADZU  
LabSolutions

# Cpd16

## <Chromatogram>

mAU

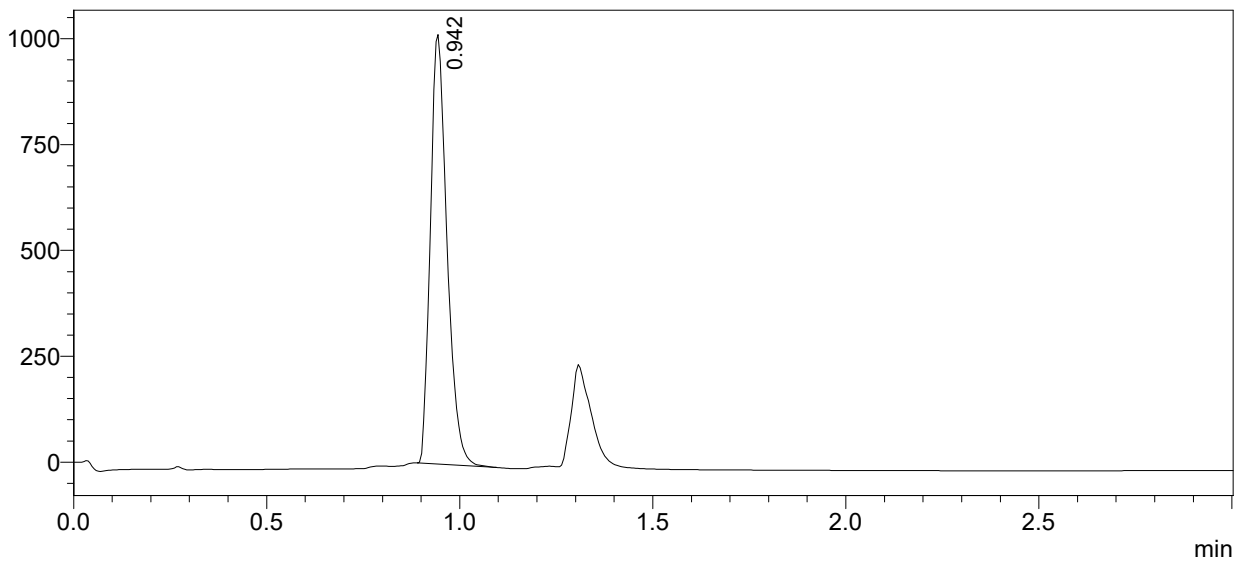



SHIMADZU  
LabSolutions

# Cpd17

## <Chromatogram>

mAU

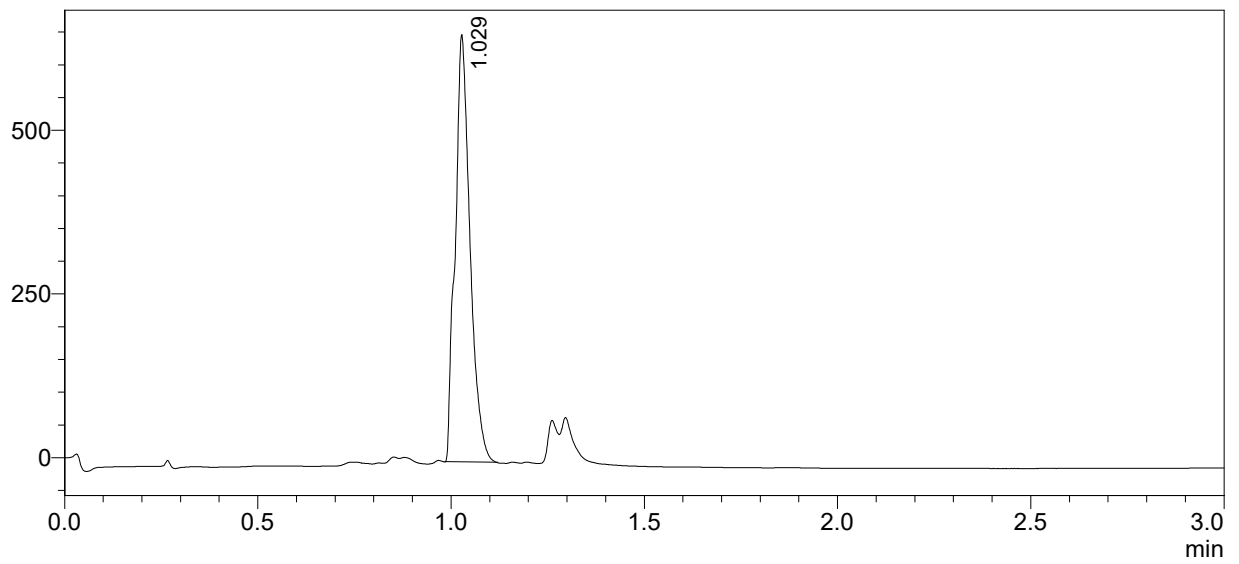

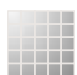

SHIMADZU  
LabSolutions

# Cpd18

## <Chromatogram>

mAU

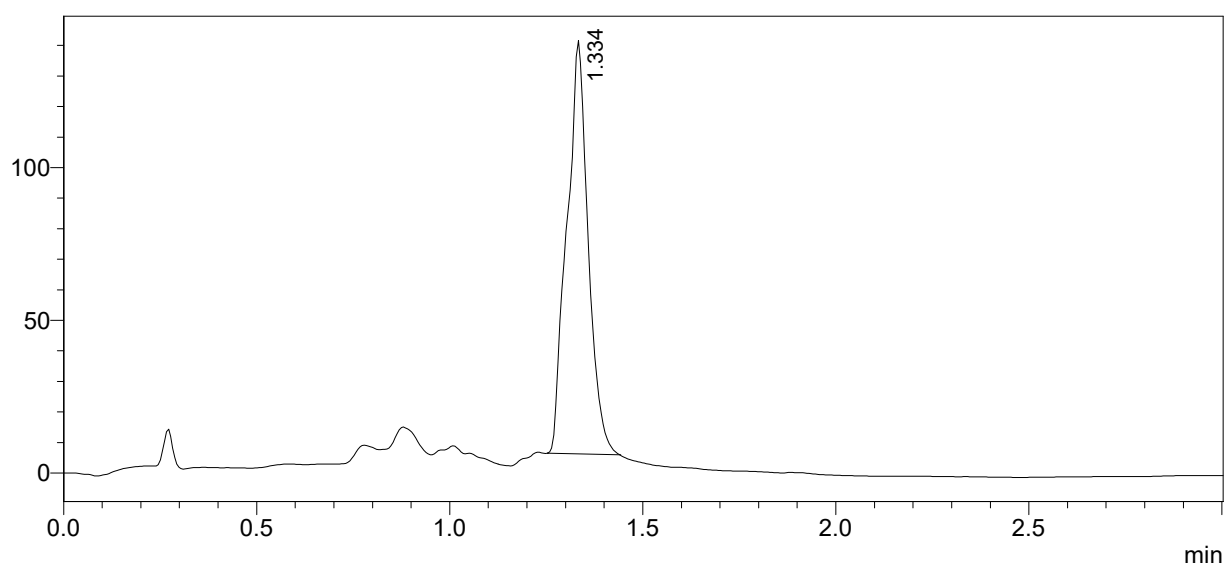

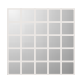

SHIMADZU  
LabSolutions

# Cpd19

## <Chromatogram>

mAU

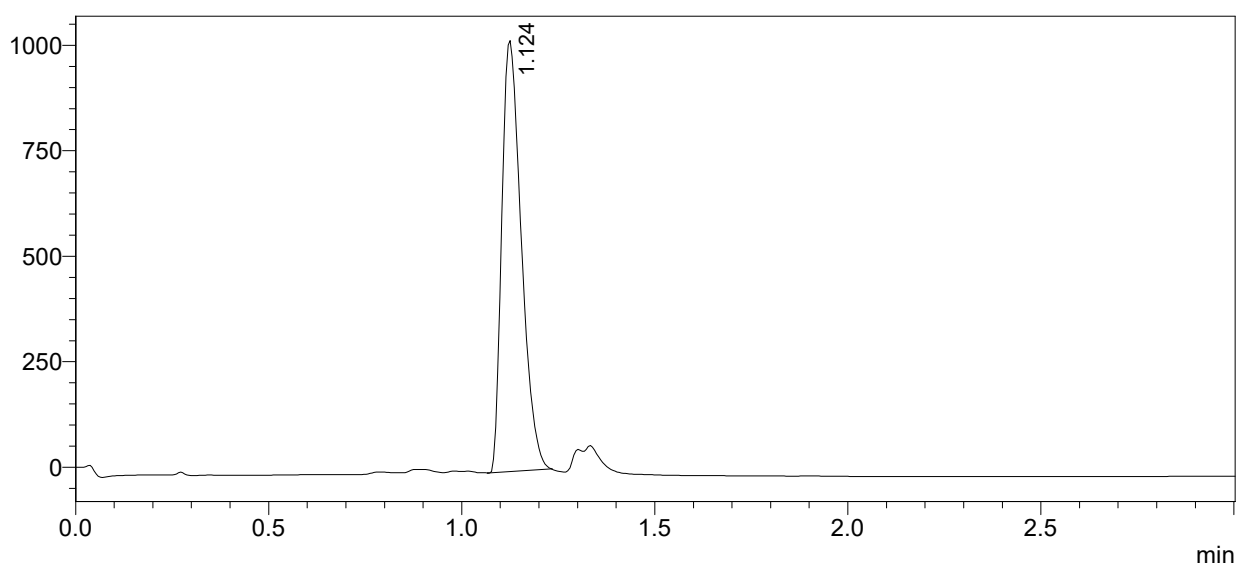



SHIMADZU  
LabSolutions

# Cpd20

## <Chromatogram>

mAU

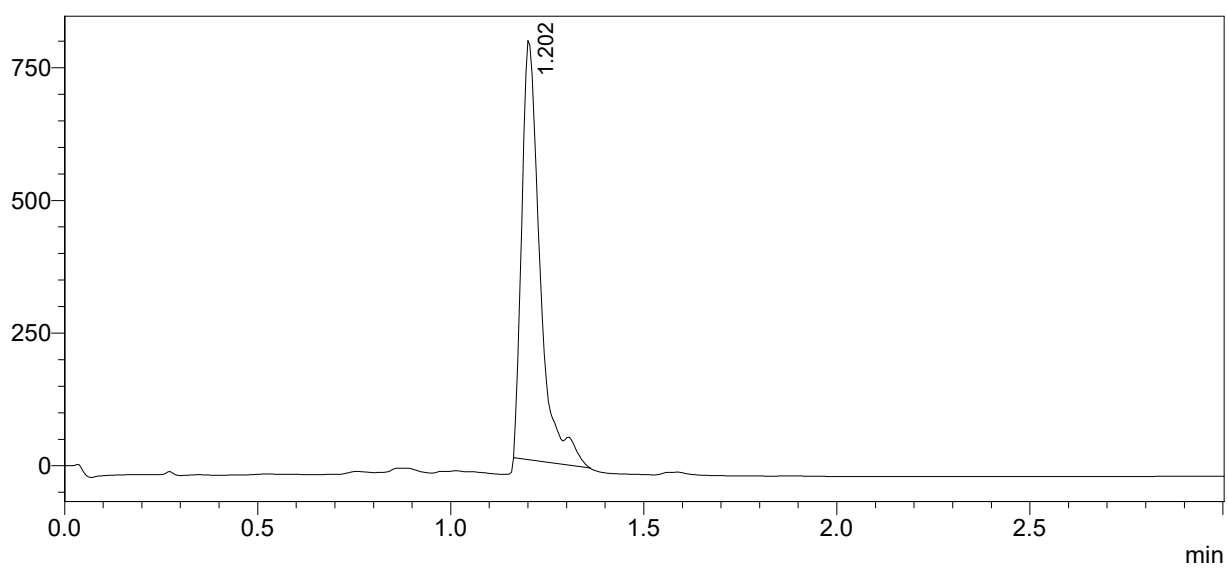

Supplement: cn1c00435_si_001.pdf [file cn1c00435_si_001.pdf]
